1 **UNC-6/Netrin and its Receptors UNC-5 and UNC-40/DCC Control Growth Cone**  
2 **Polarity, Microtubule Accumulation, and Protrusion**

3

4 Mahekta R. Gujar, Lakshmi Sundararajan, Aubrie Stricker, and Erik A. Lundquist\*

5

6 Program in Molecular, Cellular, and Developmental Biology

7 Department of Molecular Biosciences

8 University of Kansas

9 1200 Sunnyside Avenue

10 Lawrence, KS 66046

11

12 \*corresponding author ([erikl@ku.edu](mailto:erikl@ku.edu))

13 **Abstract**

14 Many axon guidance ligands and their receptors have been identified, but it is still unclear  
15 how these ligand-receptor interactions regulate events in the growth cone, such as protrusion  
16 and cytoskeletal arrangement, during directed outgrowth *in vivo*. In this work, we dissect the  
17 multiple and complex effects of UNC-6/Netrin on the growth cone. Previous studies showed  
18 that in *C. elegans*, the UNC-6/Netrin receptor UNC-5 regulates growth cone polarity, as  
19 evidenced by loss of asymmetric dorsal F-actin localization and protrusion in *unc-5* mutants.  
20 UNC-5 and another UNC-6/Netrin receptor UNC-40/DCC also regulate the extent of  
21 protrusion, with UNC-40/DCC driving protrusion and UNC-5 inhibiting protrusion. In this  
22 work we analyze the roles of UNC-6/Netrin, UNC-40/DCC, and UNC-5 in coordinating  
23 growth cone F-actin localization, microtubule organization, and protrusion that results in  
24 directed outgrowth away from UNC-6/Netrin. We find that a previously-described pathway  
25 involving the UNC-73/Trio Rac GEF and UNC-33/CRMP that acts downstream of UNC-5,  
26 regulates growth cone dorsal asymmetric F-actin accumulation and protrusion. *unc-5* and  
27 *unc-33* mutants also display excess EBP-2::GFP puncta, suggesting that MT + end  
28 accumulation is important in growth cone polarity and/or protrusion. *unc-73* Rac GEF  
29 mutants did not display excess EBP-2::GFP puncta despite larger and more protrusive growth  
30 cones, indicating a MT-independent mechanism to polarize the growth cone and to inhibit  
31 protrusion, possibly via actin. Finally, we show that UNC-6/Netrin and UNC-40/DCC are  
32 required for excess protrusion in *unc-5* mutants, but not for loss of F-actin asymmetry or MT  
33 + end accumulation, indicating that UNC-6/Netrin and UNC-40/DCC are required for  
34 protrusion downstream of F-actin asymmetry and MT + end entry. Our data suggest a model  
35 in which UNC-6/Netrin polarizes the growth cone via UNC-5, and then regulates a balance of  
36 pro- and anti-protrusive forces driven by UNC-40 and UNC-5, respectively, that result in  
37 directed protrusion and outgrowth.

## 38 Introduction

39 Neural circuits and networks are formed by intricate interactions of axonal growth cones with  
40 the extracellular environment (TESSIER-LAVIGNE AND GOODMAN 1996; MORTIMER *et al.*  
41 2008). Many extracellular molecules that guide growth cone migrations have been identified,  
42 but the effects of these guidance molecules on growth cone morphology during outgrowth *in*  
43 *vivo* are incompletely understood.

44 The secreted UNC-6/Netrin guidance cue and its receptors UNC-5 and UNC-40/DCC guide  
45 cell and growth cone migrations in a manner conserved from invertebrates to mammals. In *C.*  
46 *elegans*, UNC-6/Netrin is expressed in cells along the ventral midline, including neurons with  
47 axons that extend down the lengths of the ventral nerve cord (WADSWORTH *et al.* 1996;  
48 ASAKURA *et al.* 2007). UNC-6 controls both ventral migrations (towards UNC-6) and dorsal  
49 migrations (away from UNC-6), and *unc-6* mutants have defects in both ventral and dorsal  
50 guidance (HEDGECOCK *et al.* 1990; NORRIS AND LUNDQUIST 2011). Ventral versus dorsal  
51 responses to UNC-6/Netrin are mediated by expression of UNC-40 and UNC-5 on growth  
52 cones. Classically, UNC-40 was thought to mediate ventral growth toward UNC-6 (CHAN *et*  
53 *al.* 1996), and UNC-5 was thought to mediate dorsal growth away from UNC-6 (LEUNG-  
54 HAGESTEIJN 1992), although UNC-40 also acts in dorsal growth along with UNC-5, likely as  
55 a heterodimer (HONG *et al.* 1999; MACNEIL *et al.* 2009; NORRIS AND LUNDQUIST 2011;  
56 NORRIS *et al.* 2014). Recent studies indicate that UNC-5 can also act in ventral migrations  
57 (LEVY-STRUMPF AND CULOTTI 2014; YANG *et al.* 2014; LIMERICK *et al.* 2018), and might  
58 serve to focus UNC-40 localization ventrally in the cell body toward the UNC-6/Netrin  
59 source. Thus, the roles of UNC-40 and UNC-5 in ventral and dorsal growth are more  
60 complex than initially appreciated.

61 The growth cones of the VD motor neuron processes migrate dorsally in a commissural route  
62 to the dorsal nerve cord (KNOBEL *et al.* 1999; NORRIS AND LUNDQUIST 2011). The VD cell  
63 bodies reside in the ventral nerve cord, and extend processes anteriorly, which then turn and  
64 begin dorsal commissural migration away from UNC-6. Mutations in *unc-6*, *unc-5*, and *unc-*  
65 *40* disrupt the dorsal guidance of the VD axons (HEDGECOCK *et al.* 1990). Commissural VD  
66 growth cones display robust and dynamic lamellipodial and filopodial protrusion localized to  
67 the dorsal leading edge, away from the UNC-6/Netrin source, resulting in directed dorsal  
68 migration (KNOBEL *et al.* 1999; NORRIS AND LUNDQUIST 2011). F-actin also accumulated at  
69 the dorsal leading edge, near the site of protrusion (NORRIS AND LUNDQUIST 2011). Previous

70 studies showed that UNC-6/Netrin, UNC-5, and UNC-40/DCC control lamellipodial and  
71 filopodial protrusion of VD growth cones (NORRIS AND LUNDQUIST 2011; NORRIS *et al.*  
72 2014). *unc-5* mutant VD growth cones showed excess protrusion, with larger lamellipodial  
73 growth cone bodies and longer and longer-lasting filopodial protrusions. Furthermore, the  
74 protrusions were no longer focused to the dorsal leading edge but occurred all around the  
75 growth cone. Finally, F-actin was no longer restricted to the dorsal leading edge but was  
76 found throughout the periphery of the growth cone in *unc-5* mutants. Thus, these large,  
77 unfocused *unc-5* mutant growth cones moved very little, consistent with findings in cultured  
78 growth cones that large, more protrusive growth cones exhibited reduced rates of movement  
79 (REN AND SUTER 2016).

80 While the effect of *unc-5* mutation on VD growth cones was severe, loss of *unc-40* had no  
81 significant effect on extent or polarity of protrusion (NORRIS AND LUNDQUIST 2011).  
82 However, constitutive activation of UNC-40 signaling (MYR::UNC-40) in VD growth cones  
83 led to small growth cones with little or no protrusion, similar to constitutive activation of  
84 UNC-5 (MYR::UNC-5) (NORRIS AND LUNDQUIST 2011; NORRIS *et al.* 2014). Functional  
85 UNC-5 was required for the inhibitory effects of MYR::UNC-40. This suggests that  
86 MYR::UNC-40 acts as a heterodimer with UNC-5 to inhibit protrusion, and in *unc-40*  
87 mutants, UNC-5 alone was sufficient to inhibit protrusion. *unc-6(ev400)* null mutants had no  
88 effect on extent of VD growth cone protrusion, but did affect polarity of protrusion as well as  
89 F-actin polarity, both lost in *unc-6* mutants (NORRIS AND LUNDQUIST 2011). Thus, UNC-  
90 6/Netrin affects VD growth cone polarity (F-actin and protrusion), but it is unclear if the  
91 effects on extent of protrusion by UNC-5 and UNC-40 involve UNC-6/Netrin.

92 These results suggest that in the same VD growth cone, UNC-40 can both drive protrusion  
93 and inhibit protrusion along with UNC-5. That the normal VD growth cone has polarized  
94 protrusion to the dorsal leading edge and reduced protrusion ventrally near the axon shaft  
95 suggests that the activities of UNC-40 and UNC-40-UNC-5 might be asymmetric across the  
96 growth cone. The *unc-6(e78)* mutation, which specifically affects interaction with UNC-5,  
97 causes excess growth cone protrusion and abolished polarity similar to *unc-5* mutants  
98 (NORRIS AND LUNDQUIST 2011), suggesting that UNC-6/Netrin inhibits protrusion through  
99 UNC-5. The involvement of UNC-6/Netrin in pro-protrusive UNC-40 activity is unclear.

100 UNC-5 affects three aspects of growth cone morphology during outgrowth *in vivo*: polarity of  
101 protrusion to the dorsal leading edge, F-actin asymmetric accumulation to the dorsal leading

102 edge, and inhibition of growth cone protrusion (NORRIS AND LUNDQUIST 2011; NORRIS *et al.*  
103 2014). Growth cone motility and guidance is dependent on the actin and microtubule  
104 cytoskeleton (DENT AND GERTLER 2003). The axon shaft and the central region of the growth  
105 cone is composed of bundled microtubules with their plus (+) ends (MT+) oriented towards  
106 the growth cone. The peripheral region of the growth cone contains highly dynamic actin that  
107 is relatively free of microtubules. The actin filaments at the leading edge of the growth cone  
108 form a branched lamellipodial meshwork and filopodial bundles in the essential in sensing  
109 guidance cues and driving the forward motion of the axon (FORSCHER AND SMITH 1988;  
110 GALLO AND LETOURNEAU 2004; PAK *et al.* 2008; DENT *et al.* 2011; OMOTADE *et al.* 2017).

111 Our previous results show an effect of UNC-5 on F-actin polarity and protrusive events  
112 driven by F-actin. We recently showed that a family of genes encoding flavin  
113 monooxygenases (FMOs) are required for inhibition of protrusion mediated by UNC-5  
114 (GUJAR *et al.* 2017). In *Drosophila* and mammals, the FMO-containing MICAL molecule  
115 causes actin depolymerization and collapse through direct oxidation of actin (TERMAN *et al.*  
116 2002; HUNG *et al.* 2010; HUNG *et al.* 2011). We previously described a second signaling  
117 pathway downstream of UNC-5 required to inhibit protrusion that includes the UNC-73/Trio  
118 Rac GEF, the Rac GTPases CED-10 and MIG-2, and the UNC-33/CRMP cytoskeletal  
119 molecule (NORRIS *et al.* 2014), which can interact with MTs in other systems (FUKATA *et al.*  
120 2002). In cultured growth cones, most stable microtubules remain in the central domain. A  
121 small population of dynamic microtubules can explore the periphery and penetrate the  
122 filopodia, where they interact with extracellular cues resulting in proper axonal elongation  
123 and guidance (SABRY *et al.* 1991; TANAKA *et al.* 1995; DENT AND GERTLER 2003; LOWERY  
124 AND VAN VACTOR 2009). Thus, motility of the growth cone is achieved through proper  
125 regulation and coordination between microtubules and the actin cytoskeleton (DENT AND  
126 KALIL 2001; BUCK AND ZHENG 2002; ZHOU *et al.* 2002; ZHOU AND COHAN 2004). MTs have  
127 been implicated in Unc5 signaling (SHAO *et al.* 2017; HUANG *et al.* 2018), but the role of  
128 MTs in UNC-5-mediated VD growth cone outgrowth *in vivo* remains unclear.

129 That UNC-5 and UNC-40 cooperate to guide migrations of axons that grow toward UNC-  
130 6/Netrin indicates that the roles of these molecules are more complex than discrete  
131 “attractive” and “repulsive” functions. The signaling pathways used by UNC-40 are well-  
132 described, but the intracellular pathways used by UNC-5 remain unclear. In this work, we  
133 analyze three aspects of growth cone behavior to understand the roles of these molecules in

134 growth away from UNC-6/Netrin: growth cone protrusion; F-actin asymmetric accumulation;  
135 and EBP-2::GFP distribution, which has been used previously to monitor MT + ends in *C.*  
136 *elegans* embryos and neurons (SRAYKO *et al.* 2005; KOZLOWSKI *et al.* 2007; YAN *et al.*  
137 2013). We find that UNC-6/Netrin is required for the excess protrusion in *unc-5* mutant  
138 growth cones, similar to UNC-40, and that UNC-6/Netrin, along with UNC-5, polarizes  
139 growth cone F-actin accumulation and protrusion to the dorsal leading edge, resulting in  
140 focused dorsal protrusion of the growth cone. We find that EBP-2::GFP puncta are found in  
141 excess in *unc-5*, *unc-6*, and *unc-33* mutant growth cones, suggesting that UNC-6/Netrin and  
142 UNC-5 signaling can block MT + end accumulation in growth cones, which correlates with  
143 inhibited growth cone protrusion, and suggests a pro-protrusive role for MTs in the growth  
144 cone. Finally, we show that UNC-6/Netrin and UNC-40 stimulate VD growth cone protrusion  
145 downstream of dorsal F-actin polarity and growth cone EBP-2::GFP accumulation. An  
146 implication of our results is that in a growth cone growing away from an UNC-6/Netrin  
147 source, UNC-6/Netrin both stimulates protrusion dorsally, away from the source, and inhibits  
148 protrusion ventrally, near the source, resulting in directed outgrowth.

## 149 **Materials and Methods**

### 150 **Genetic methods**

151 Experiments were performed at 20°C using standard *C. elegans* techniques. Mutations used  
152 were LGI: *unc-40*(*n324* and *e1430*), *unc-73*(*rh40*, *e936*, *ev802* and *ce362*); LGII:  
153 *juIs76*[*Punc-25::gfp*]. LGIV: *unc-5*(*e53*, *e553*, *e791* and *e152*), *unc-33*(*e204* and *e1193*),  
154 *unc-44*(*e362*, *e1197* and *e1260*), *ced-10*(*n1993*); LGX: *unc-6*(*ev400*), *unc-6*(*e78*), *mig-*  
155 *2*(*mu28*), *lqIs182* [*Punc-25::mig-2*(*G16V*)], *lqIs170* [*rgef-1::vab-10ABD::gfp*]. Chromosomal  
156 locations not determined: *lqIs279* and *lqIs280* [*Punc-25::ebp-2::gfp*], *lqIs296* [*Punc-*  
157 *25::myr::unc-5*], *lhIs6* [*Punc-25::mCherry*]. The presence of mutations in single and double  
158 mutant strains was confirmed by phenotype, PCR genotyping, and sequencing.  
159 Extrachromosomal arrays were generated using standard gonadal injection (MELLO AND FIRE  
160 1995) and include: *lqEx999* and *lqEx1000* [*Punc-25::myr::unc-40*; *Pgcy-32::yfp*], *lqEx1017*  
161 and *lqEx1018* [*Punc-25::ced-10*(*G12V*); *Pgcy-32::yfp*]. Multiple ( $\geq 3$ ) extrachromosomal  
162 transgenic lines of transgenes described here were analyzed with similar effect, and one was  
163 chosen for integration and further analysis. The *mig-2*(*mu28*); *ced-10*(*n1993M+*) strain was  
164 balanced with the nT1 balancer. The *Punc-25::ebp-2::gfp* plasmid was constructed using  
165 standard recombinant DNA techniques. The sequences of all plasmids and all  
166 oligonucleotides used in their construction are available upon request.

167

### 168 **Growth cone imaging**

169 VD growth cones were imaged and quantified as previously described (NORRIS AND  
170 LUNDQUIST 2011). Briefly, animals at ~16 h post-hatching at 20°C were placed on a 2%  
171 agarose pad and paralyzed with 5mM sodium azide in M9 buffer, which was allowed to  
172 evaporate for 4 min before placing a coverslip over the sample. Some genotypes were slower  
173 to develop than others, so the 16 h time point was adjusted for each genotype. Growth cones  
174 were imaged with a Qimaging Rolera mGi camera on a Leica DM5500 microscope. Images  
175 were analyzed in ImageJ, and statistical analyses done with Graphpad Prism software. As  
176 described in (NORRIS AND LUNDQUIST 2011; NORRIS *et al.* 2014), growth cone area was  
177 determined by tracing the perimeter of the growth cone body, not including filopodia.  
178 Average filopodial length was determined using a line tool to trace the length of the  
179 filopodium. Unless otherwise indicated,  $\geq 25$  growth cones were analyzed for each genotype.  
180 These data were gathered in ImageJ and entered into Graphpad Prism for analysis. A two-  
181 sided *t*-test with unequal variance was used to determine significance of difference between  
182 genotypes.

183

### 184 **VAB-10ABD::**GFP** imaging**

185 The F-actin binding domain of VAB-10/spectraplaklin fused to GFP has been used to monitor  
186 F-actin in *C. elegans* (BOSHER *et al.* 2003; PATEL *et al.* 2008). We used it to image F-actin in  
187 the VD growth cones as previously described (NORRIS AND LUNDQUIST 2011). To control for  
188 variability in growth cone size and shape, and as a reference for asymmetric localization of  
189 VAB-10ABD::**GFP**, a soluble mCherry volume marker was included in the strain. Growth  
190 cones images were captured as described above. ImageJ was used image analysis to  
191 determine asymmetric VAB-10ABG::**GFP** localization. For each growth cone, five line scans  
192 were made from dorsal to ventral (see Results). For each line, pixel intensity was plotted as a  
193 function of distance from the dorsal leading edge of the growth cone. The average intensity  
194 (arbitrary units) and standard error for each growth cone was determined. For dorsal versus  
195 ventral comparisons, the pixel intensities for VAB-10ABD::**GFP** were normalized to the  
196 volumetric mCherry fluorescence in line scans from the dorsal half and the ventral half of  
197 each growth cone. This normalized ratio was determined for multiple growth cones, and the  
198 average and standard error for multiple growth cones was determined. Statistical comparisons  
199 between genotypes were done using a two-tailed *t*-test with unequal variance on these  
200 average normalized ratios of multiple growth cones of each genotype.

201

### 202 **EBP-2::**GFP** imaging**

203 EBP-2::**GFP** has previously been used to monitor microtubule plus ends in other *C. elegans*  
204 cells including neurons (SRAYKO *et al.* 2005; KOZLOWSKI *et al.* 2007; YAN *et al.* 2013). We  
205 constructed a transgene consisting of the *unc-25* promoter driving expression of *ebp-2::**gfp*** in  
206 the VD/DD neurons. In growth cones, a faint fluorescence was observed throughout the  
207 growth cone, resembling a soluble GFP and allowing for the growth cone perimeter to be  
208 defined. In addition to this faint, uniform fluorescence, brighter puncta of EBP-2::**GFP** were  
209 observed that resembled the EBP-1::**GFP** puncta described in other cells and neurons. For  
210 each growth cone, the perimeter and filopodia were defined, and the EBP-2::**GFP** puncta in  
211 the growth cone were counted. For each genotype, the puncta number for many growth cones  
212 ( $\geq 25$  unless otherwise noted) was determined. Puncta number displayed high variability  
213 within and between genotypes, so box-and-whiskers plots (Graphpad Prism) were used to  
214 accurately depict this variation. The grey boxes represent the upper and lower quartiles of the  
215 data set, and the “whiskers” represent the high and low values. Dots represent major outliers.  
216 Significance of difference was determined by a two-sided *t*-test with unequal variance.



217

218 **Data availability**

219 Strains and plasmids are available upon request. The authors affirm that all data necessary for  
220 confirming the conclusions of the article are present within the article, figures, and tables.

221 **Results**

222 **Functional UNC-6 is required for excess growth cone protrusion of *unc-5* mutants.**

223 Previous studies have shown that *unc-5* mutants displayed increased VD growth cone  
224 protrusiveness with larger growth cone area and longer filopodial protrusions as compared to  
225 wild-type (NORRIS AND LUNDQUIST 2011). However, *unc-5; unc-40* double mutants were  
226 found to have near wild-type levels of VD growth cone protrusion, suggesting that a  
227 functional UNC-40 was required for the over protrusive growth cone phenotype observed in  
228 *unc-5* loss of function mutants alone (NORRIS AND LUNDQUIST 2011). *unc-6(ev400)* also  
229 suppressed the excess growth cone protrusion (growth cone size and filopodial length) of  
230 *unc-5* mutants (Figure 1A-E), suggesting that excess protrusion in *unc-5* mutants also  
231 requires functional UNC-6.

232

233 **VD Growth cone F-actin and EBP-2::GFP organization.**

234 The F-actin binding domain of the spectraplaklin VAB-10 was previously used to monitor F-  
235 actin in the VD growth cone in *C. elegans* (NORRIS AND LUNDQUIST 2011). In wild-type VD  
236 growth cones F-actin preferentially localized to the leading edge of the growth cone (~1.23  
237 fold more accumulation in the dorsal half of the growth vs the ventral half) (Figure 2 and  
238 (NORRIS AND LUNDQUIST 2011)). Most growth cone filopodial protrusion occurs at the dorsal  
239 leading edge of the VD growth cone, correlating with F-actin accumulation.

240

241 The MT+-end binding protein EBP-2 fused to GFP has been used previously to monitor MT+  
242 ends in embryos and neuronal processes in *C. elegans* (SRAYKO *et al.* 2005; KOZLOWSKI *et*  
243 *al.* 2007; MANIAR *et al.* 2012; YAN *et al.* 2013; KURUP *et al.* 2015). We expressed *ebp-2::gfp*  
244 in the VD/DD neurons using the *unc-25* promoter. Puncta of EBP-2::GFP fluorescence were  
245 distributed along the length of commissural axons (arrows in Figure 2H) and in growth cones  
246 (arrowheads in Figure 2H and arrows in Figure 2J-L). In wild-type VD growth cones, an  
247 average of 2 EBP-2::GFP puncta were observed in the growth cone itself (Figure 2I). These  
248 were present at the growth cone base (arrowheads in Figure 2H) as well as in the growth cone  
249 periphery (Figure 2J). These data show that in wild-type, EBP-2::GFP puncta were abundant  
250 in the axon as previously observed, but relatively rare in the growth cone.

251

252 **UNC-5 and UNC-6 affect VD growth cone F-actin dorsal asymmetry and EBP-2::GFP**  
253 **accumulation.**

254 In *unc-6* and *unc-5* mutants, VAB-10ABD::GFP dorsal asymmetry in the VD growth cone  
255 was abolished (Figure 3A and D and (NORRIS AND LUNDQUIST 2011)). VAB-10ABD::GFP  
256 was observed at the growth cone periphery, but often in lateral and even ventral positions  
257 (Figure 3D). This loss of VAB-10ABD::GFP asymmetry was accompanied by a  
258 corresponding loss of dorsal asymmetry of filopodial protrusion, which occurred all around  
259 the growth cone in *unc-5* and *unc-6* mutants (NORRIS AND LUNDQUIST 2011). *unc-40* null  
260 mutants displayed relatively normal VD growth cone protrusion compared to wild-type and  
261 also showed no effect on VAB-10ABD::GFP distribution (Figure 3A and C and (NORRIS AND  
262 LUNDQUIST 2011)). These results suggest that UNC-6 and UNC-5 normally control  
263 distribution of F-actin to the dorsal leading edge of the VD growth cone, and thus restrict  
264 filopodial protrusion to the dorsal leading edge.

265

266 *unc-5* and *unc-6* mutants displayed significantly increased numbers of EBP-2::GFP puncta in  
267 VD growth cones and filopodial protrusions (Figure 2I and L). In some mutant growth cones,  
268 more than eight puncta were observed, whereas wild-type never showed more than five. *unc-*  
269 *40* mutants displayed no significant increase in EBP-2::GFP puncta accumulation (Figure 2I  
270 and K). Sizes of EBP-2::GFP puncta in *C. elegans* neurons were previously found to be on  
271 the order of the smaller puncta we observe in wild type (~100nm) (Figure 2J) (MANIAR *et al.*  
272 2012). In *unc-5* and *unc-6* mutants, we observed larger puncta (~0.5-1 $\mu$ m) (Figure 2L). We  
273 do not understand the nature of the distinct puncta sizes, but the same integrated transgene  
274 was used to analyze wild-type and mutants. This suggests that puncta size and number are an  
275 effect of the mutant and not transgene variation. In sum, these studies suggest that UNC-5  
276 and UNC-6 are required for the dorsal bias of F-actin accumulation in VD growth cones, and  
277 might be required to restrict MT + end entry into VD growth cones as represented by  
278 increased numbers of EBP-2::GFP puncta in mutant growth cones.

279

280 **EBP-2::GFP puncta accumulation and loss of growth cone F-actin polarity in *unc-5***  
281 **mutants is not dependent on functional UNC-6 or UNC-40.**

282 We found that in *unc-5(e53); unc-40(n324)* and *unc-5(e53); unc-6(ev400)* double mutants,  
283 VAB-10ABD::GFP distribution resembled that of *unc-5* mutants alone (i.e. was randomized  
284 in the growth cone) (Figure 4A-D). Likewise, EBP-2::GFP accumulation resembled *unc-5*,  
285 with increased EBP-2::GFP puncta compared to wild-type or *unc-40* alone (Figure 4E-H).  
286 Thus, while UNC-6 and UNC-40 activities were required for the excess growth cone  
287 protrusion observed in *unc-5* mutants, they were not required for randomized F-actin or for

288 increased EBP-2::GFP accumulation. These results suggest that UNC-6 and UNC-40 have a  
289 role in protrusion that is independent of UNC-5-mediated F-actin dorsal accumulation and  
290 EBP-2::GFP accumulation. Consistent with this idea, *unc-6(ev400)* null mutants alone  
291 displayed loss of F-actin polarity and increased EBP-2::GFP puncta (Figures 3 and 4), but not  
292 increased protrusion (Figure 1) (NORRIS AND LUNDQUIST 2011), suggesting that UNC-6 is  
293 required for both UNC-40-mediated protrusion and UNC-5-mediated inhibition of protrusion.  
294

### 295 **UNC-73 Rac GEF activity controls growth cone F-actin polarity.**

296 Previous studies showed that the Rac GTP exchange factor activity of UNC-73 was required  
297 to inhibit growth cone protrusion downstream of UNC-5 (NORRIS *et al.* 2014). *unc-73(rh40)*,  
298 which specifically eliminates the Rac GEF activity of the molecule (Figure 5A) (STEVEN *et*  
299 *al.* 1998), resulted in excessive filopodial protrusion (Figure 5B, C, and E, and (NORRIS *et al.*  
300 2014)). *unc-73(rh40)* mutants displayed a loss of VAB-10ABD::GFP dorsal symmetry in the  
301 VD growth cone similar to *unc-5* and *unc-6* mutants (Figure 6A and C). However, *unc-*  
302 *73(rh40)* mutants did not show significantly increased EBP-2::GFP puncta distribution  
303 compared to wild-type (Figure 6E and G). Thus, despite having excessively protrusive  
304 growth cones, *unc-73(rh40)* mutants did not display increased EBP-2::GFP puncta number.  
305 This indicates that the increased numbers of EBP-2::GFP puncta observed in *unc-5* and *unc-6*  
306 mutants was not simply due to larger growth cone size. This result also indicates that excess  
307 growth cone protrusion can occur in the absence of increased numbers of EBP-2::GFP  
308 puncta.  
309

310 The C- terminal GEF domain of UNC-73 controls the Rho GTPase (Figure 5A) (SPENCER *et*  
311 *al.* 2001) and has been shown to affect motility and normal synaptic neurotransmission  
312 (STEVEN *et al.* 2005; HU *et al.* 2011). *unc-73(ce362)* is a missense mutation in the Rho GEF  
313 domain (Figure 5A) (WILLIAMS *et al.* 2007; HU *et al.* 2011; MCMULLAN *et al.* 2012) and  
314 *unc-73(ev802)* is a 1,972 bp deletion which completely deletes the Rho GEF domain (Figure  
315 5A) (WILLIAMS *et al.* 2007). *unc-73(ce362)* and *unc-73(ev802)* displayed reduced growth  
316 cone body size, and increased filopodial length (Figure 5B, C, F, and G) Neither *unc-*  
317 *73(ce362)* nor *unc-73(ev802)* had an effect on growth cone F-actin dorsal accumulation  
318 (Figure 6A and D), but both showed a significant increase in growth cone EBP-2::GFP  
319 puncta (Figure 6E and 6H). Thus, Rho GEF activity of UNC-73/Trio might have distinct  
320 effects on growth cone morphology compared to Rac GEF activity.  
321

322 **The Rac GTPases CED-10 and MIG-2 affect F-actin polarity but not EBP-2::GFP**  
323 **puncta accumulation in VD growth cones.**

324 The Rac GTPases CED-10/Rac and MIG-2/RhoG have been shown to redundantly control  
325 axon guidance (LUNDQUIST *et al.* 2001; STRUCKHOFF AND LUNDQUIST 2003). CED-10 and  
326 MIG-2 act with UNC-40 to stimulate protrusion in axons attracted to UNC-6/Netrin  
327 (DEMARCO *et al.* 2012), and to inhibit growth cone protrusion with UNC-5-UNC-40 in the  
328 repelled VD growth cones (NORRIS *et al.* 2014). The Rac GEF TIAM-1 acts with CED-10  
329 and MIG-2 to stimulate protrusion (DEMARCO *et al.* 2012), and the Rac GEF UNC-73/Trio  
330 acts in the anti-protrusive pathway (NORRIS *et al.* 2014).

331

332 The VD growth cones of *mig-2; ced-10* double mutants resembled wild-type, except that the  
333 filopodial protrusions had a longer maximal length and were longer lasting (NORRIS *et al.*  
334 2014). This subtle phenotype might represent the fact that the molecules have roles in both  
335 pro- and anti-protrusive pathways. *mig-2(mu28)* and *ced-10(n1993)* single mutants and *ced-*  
336 *10; mig-2* double mutants all showed significant F-actin polarity defects (Figure 7A-D),  
337 consistent with the idea that the GEF domain of Trio affects actin organization through Rac  
338 activation. However, VD/DD axon guidance defects in *mig-2* and *ced-10* single mutants were  
339 much less severe than the *mig-2; ced-10* double mutants and *unc-73(rh40)* (NORRIS *et al.*  
340 2014). *unc-73(rh40)* and *mig-2; ced-10* double mutants might have additional effects on axon  
341 guidance compared to *mig-2* and *ced-10* double mutants not observed in these studies.  
342 Similar to *unc-5; unc-40* double mutants, loss of asymmetry of F-actin did not result in  
343 excess protrusion in *mig-2* and *ced-10* single mutants.

344

345 *ced-10* and *mig-2* single mutants had no significant effect on EBP-2 distribution in the VD  
346 growth cone (Figure 7E and H). However, *ced-10; mig-2* double mutants showed a  
347 significant increase in EBP-2 puncta distribution in the VD growth cone and filopodial  
348 protrusions as compared to wild-type and the single mutants alone (Figure 7E and I). This  
349 result suggests that the Rac GTPases CED-10 and MIG-2 act redundantly in limiting EBP-2  
350 puncta distribution in the VD growth cone. This also indicates that MIG-2 and CED-10 have  
351 a role in limiting EBP-2::GFP puncta that is independent of UNC-73/Trio Rac GEF activity.

352

353 **UNC-33/CRMP and UNC-44/ankyrin are required for F-actin polarity and restricting**  
354 **EBP-2::GFP from the VD growth cone.**

355 Previous studies showed that UNC-33/CRMP and UNC-44/ankyrin act downstream of UNC-  
356 5 and Rac GTPases to limit growth cone protrusion (NORRIS *et al.* 2014). *unc-33* and *unc-44*  
357 mutants randomized F-actin polarity similar to *unc-5* and *unc-73(rh40)* (Figure 8A-D). *unc-*  
358 *33* and *unc-44* also displayed a significant increase in EBP-2::GFP puncta in the growth cone  
359 and protrusions (Figure 8E-H). Thus, UNC-33 and UNC-44 are both required for dorsal F-  
360 actin asymmetry as well as restriction of EBP-2::GFP growth cone puncta. That *unc-33* and  
361 *unc-44* phenotypes are similar to *unc-5* is consistent with the previous genetic interactions  
362 placing UNC-33 and UNC-44 in the UNC-5 pathway.

363

### 364 **Constitutive activation of UNC-40, UNC-5, CED-10 and MIG-2 affects F-actin polarity** 365 **and EBP-2 distribution.**

366 The heterodimeric receptor UNC-5-UNC-40 is required for inhibition of growth cone  
367 protrusion in UNC-6/netrin repulsive axon guidance (NORRIS AND LUNDQUIST 2011; NORRIS  
368 *et al.* 2014). Constitutive activation of UNC-40 and UNC-5 by addition of an N-terminal  
369 myristoylation signal to their cytoplasmic domain (GITAI *et al.* 2003; NORRIS AND  
370 LUNDQUIST 2011) causes a significant decrease in VD growth cone protrusiveness, with a  
371 reduction in growth cone area and filopodial protrusions (DEMARCO *et al.* 2012; NORRIS *et al.*  
372 2014). The Rac GTPases CED-10 and MIG-2 have been shown to act in both stimulation and  
373 inhibition of growth cone protrusion (DEMARCO *et al.* 2012; NORRIS *et al.* 2014). The  
374 constitutively activated Rac GTPases CED-10(G12V) and MIG-2(G16V) also cause an  
375 inhibited VD growth cone phenotype similar to *myr::unc-40* and *myr::unc-5* (NORRIS *et al.*  
376 2014).

377

378 We assayed VAB-10ABD::GFP and EBP-2::GFP distribution in the VD growth cones of  
379 these various activated molecules. All four (MYR::UNC-5, MYR::UNC-40, CED-10(G12V),  
380 and MIG-2(G16V) showed peripheral accumulation around the entire growth cone, with the  
381 dorsal bias lost (Figure 9A-D). Furthermore, we observed significantly fewer EBP-2::GFP  
382 puncta compared to wild type in each case (Figure 9E-H). Thus, constitutive activation of  
383 UNC-5, UNC-40, CED-10, and MIG-2 might lead to F-actin accumulation around the entire  
384 periphery of the growth cone, as opposed to dorsal bias, and might restrict MT + ends from  
385 accumulating in the growth cone.

## 386 Discussion

387 Netrins are thought to regulate dorsal-ventral axon guidance through a conserved mechanism  
388 involving ventral expression of Netrin coupled with expression of UNC-40/DCC receptors on  
389 attracted axons and UNC-5 receptors on repelled axons. Recent studies have highlighted the  
390 previously-underappreciated complexity of UNC-6/Netrin function in axon guidance. In *C.*  
391 *elegans*, UNC-5 acts in axons that grow toward Netrin to focus UNC-40 activity (LEVY-  
392 STRUMPF AND CULOTTI 2014; YANG *et al.* 2014; LIMERICK *et al.* 2018), and both UNC-40  
393 and UNC-5 act in the same growth cone to mediate protrusion in directed guidance away  
394 from UNC-6/Netrin (NORRIS AND LUNDQUIST 2011; NORRIS *et al.* 2014). In this work, we  
395 analyze three aspects of VD growth cone morphology (growth cone protrusion, F-actin  
396 accumulation, and EBP-2::GFP accumulation) to probe the roles of UNC-6/Netrin, UNC-  
397 40/DCC, and UNC-5 in growth away from UNC-6/Netrin. We find that UNC-6/Netrin  
398 signaling coordinates these growth cone features to result in directed growth away from it.  
399

400 Previous studies suggested that UNC-6/Netrin and the receptor UNC-5-UNC-40 inhibit  
401 growth cone protrusion and are required to polarize F-actin to the dorsal protrusive leading  
402 edge in repelled VD growth cones in *C. elegans* (NORRIS AND LUNDQUIST 2011; NORRIS *et*  
403 *al.* 2014). Furthermore, previous studies defined a new signaling pathway downstream of  
404 UNC-5-UNC-40 in repulsive axon guidance and inhibition of growth cone protrusion. This  
405 pathway consists of the Rac GTP exchange factor UNC-73/Trio, the Rac GTPases CED-10  
406 and MIG-2, and the cytoskeletal interacting molecules UNC-44/ankyrin and UNC-33/CRMP  
407 (NORRIS *et al.* 2014). Loss of function in these molecules led to excess growth cone  
408 protrusion, and activation led to constitutively-inhibited growth cone protrusion. Using VAB-  
409 10ABD::GFP to visualize F-actin and EBP-2::GFP to visualize MT + ends, we endeavored in  
410 this work to define the effects of members of this pathway on the cytoskeleton of the VD  
411 growth cone. We found that mutations in *unc-5*, *unc-6*, *unc-33*, and *unc-44* led to excessively  
412 protrusive growth cones with randomized F-actin distribution and increased numbers of EBP-  
413 2::GFP puncta in the growth cones. *unc-40* mutation suppressed the excess protrusion of *unc*-  
414 5 mutants but not the F-actin randomization nor the excess EBP-2::GFP puncta, suggesting  
415 that UNC-40 might have a stimulatory role in protrusion independent of UNC-5. We found  
416 that Rac GEF activity was required to inhibit protrusion and for F-actin dorsal bias, but was  
417 not required to restrict EBP-2::GFP puncta, suggesting a mechanism distinct from EBP-  
418 2::GFP puncta increase that stimulates growth cone protrusion. Finally, we found a complex

419 involvement of the Rac GTPases in protrusion, F-actin bias, and EBP-2::GFP puncta that is  
420 consistent with these molecules having both pro- and anti-protrusive roles in the growth cone.

421

422 **UNC-5 and UNC-6/Netrin might inhibit MT+ - end accumulation in the VD growth**

423 **cone.** Loss of *unc-5* and *unc-6* caused significant mislocalization of F-actin and significantly  
424 increased the average number of EBP-2::GFP puncta distribution in VD growth cones  
425 (Figures 2 and 3), which have been used to track MT + ends in *C. elegans* neurons and  
426 embryos (SRAYKO *et al.* 2005; KOZLOWSKI *et al.* 2007; MANIAR *et al.* 2012; YAN *et al.* 2013;  
427 KURUP *et al.* 2015). UNC-6 and UNC-5 might inhibit growth cone protrusion by preventing  
428 F-actin formation in the ventral/lateral regions of the growth cone to restrict protrusion to the  
429 dorsal leading edge, and by preventing accumulation of MT + ends in the growth cone. In  
430 cultured growth cones, MTs are involved in both DCC and UNC5C-mediated axon  
431 outgrowth, and DCC and UNC5C physically associate with MTs in a Netrin-dependent  
432 manner in cultured cells (QU *et al.* 2013; SHAO *et al.* 2017; HUANG *et al.* 2018). Our results  
433 suggest a link between UNC-6/Netrin signaling and VD growth cone MTs *in vivo*.

434

435 **MTs in the growth cone might be pro-protrusive.** Our data show a correlation between  
436 MT + ends in growth cones and excess growth cone protrusion. This is consistent with *in*  
437 *vitro* studies of growth cones in which MT + end entry into the growth cone is tightly  
438 regulated, is intimately associated with F-actin, and is essential for protrusion and outgrowth  
439 (LOWERY AND VAN VACTOR 2009; DENT *et al.* 2011; VITRIOL AND ZHENG 2012; COLES AND  
440 BRADKE 2015). Possibly, MT entry into growth cones serves as a conduit for transport of  
441 vesicles, organelles, and pro-protrusive factors involved in actin polymerization that drive  
442 filopodial protrusion in *C. elegans*, such as Arp2/3, UNC-115/abLIM, and UNC-34/Enabled  
443 (SHAKIR *et al.* 2006; SHAKIR *et al.* 2008; NORRIS *et al.* 2009). This is consistent with results  
444 from cultured growth cones showing that MT stabilization results in growth cone turning in  
445 the direction of stabilization, and MT destabilization results in growth cone turning away  
446 from MT destabilization (BUCK AND ZHENG 2002). Also, MTs are involved in both DCC and  
447 UNC5C-mediated axon guidance (QU *et al.* 2013; SHAO *et al.* 2017; HUANG *et al.* 2018), and  
448 physically associate with UNC5C, which is decoupled by Netrin and associated with growth  
449 away from Netrin (SHAO *et al.* 2017). We have no evidence that UNC-5 or UNC-40  
450 physically associate with MTs, but these data are consistent with MTs having a pro-  
451 protrusive role (i.e. protrusion depends on UNC-40 and MTs, and inhibiting protrusion via  
452 UNC-5 results in fewer growth cone MTs).



453 **UNC-40 might have a pro-protrusive role downstream of EBP-2::GFP puncta and F-**  
454 **actin polarity.** *unc-40* alone showed wild-type levels of protrusion (NORRIS AND LUNDQUIST  
455 2011), and here we find that *unc-40* did not affect F-actin polarity or EBP-2::GFP puncta  
456 accumulation. Previous work showed that a functional UNC-40 is required for the large  
457 protrusive growth cones seen in *unc-5* single mutants (NORRIS AND LUNDQUIST 2011).  
458 However, *unc-5; unc-40* double mutants, despite have smaller growth cones, showed loss of  
459 F-actin polarity and excess EBP-2::GFP puncta similar to *unc-5* alone (Figure 4). Thus,  
460 UNC-40 might have a role in protrusion that is downstream of F-actin polarity and EBP-  
461 2::GFP puncta. In migrating embryonic cells and anchor cell invasion, UNC-40 affects over  
462 all F-actin levels but not F-actin polarity (BERNADSKAYA *et al.* 2012; WANG *et al.* 2014).  
463 Something similar might be occurring in the growth cone, where UNC-40 has a role in actin  
464 polymerization but not polarity, which might be determined by UNC-5 or the UNC-5-UNC-  
465 40 heterodimer. This is similar to recent results in neurons with axons that grow ventrally  
466 toward the UNC-6/Netrin source, which require UNC-5 for ventral guidance (KULKARNI *et*  
467 *al.* 2013; LEVY-STRUMPF AND CULOTTI 2014). In this case, UNC-40 drives protrusion and is  
468 polarized ventrally in the cell body by UNC-6/Netrin. UNC-5 further refines this UNC-40  
469 localization of protrusion and prevents lateral and ectopic protrusions (KULKARNI *et al.* 2013;  
470 YANG *et al.* 2014; LIMERICK *et al.* 2018). Our results suggest that F-actin and EBP-2::GFP  
471 accumulation, controlled by UNC-5, are pro-protrusive, and that UNC-40 might act  
472 downstream of these events to drive growth cone protrusion.

473

474 **The Rac GEF domain of UNC-73 inhibits protrusion independently of restricting MT +**  
475 **ends.** Rac GTPases CED-10 and MIG-2 and the UNC-73/Trio Rac GEF have been shown to  
476 play central roles in axon guidance (STEVEN *et al.* 1998; LUNDQUIST *et al.* 2001; LUNDQUIST  
477 2003; STRUCKHOFF AND LUNDQUIST 2003). Rac GTPases CED-10 and MIG-2 are required to  
478 both stimulate and inhibit protrusion, with distinct GEFs regulate each of these activities.  
479 TIAM-1 stimulates protrusion (DEMARCO *et al.* 2012), and UNC-73 limiting protrusion  
480 (NORRIS *et al.* 2014). The *unc-73(rh40)* mutation eliminates the Rac GEF activity of UNC-73  
481 but does not affect Rho GEF activity (STEVEN *et al.* 1998). *unc-73(rh40)* mutants displayed  
482 F-actin polarity defects (Figure 6) consistent with the idea that UNC-73 regulates actin  
483 dynamics during cell growth and growth cone migrations (STEVEN *et al.* 1998; BATEMAN *et*  
484 *al.* 2000; LUNDQUIST *et al.* 2001; WU *et al.* 2002). We found that *unc-73(rh40)* had no effect  
485 on EBP-2::GFP accumulation in VD growth cones despite having larger, more protrusive  
486 growth cones (Figure 6). Despite the large, overly-protrusive growth cones, *unc-73(rh40)*

487 mutants did not display excess EBP-2::GFP puncta as observed in *unc-6*, *unc-5*, and *unc-33*  
488 mutants. This indicates that the excess EBP-2::GFP puncta in *unc-5*, *unc-6*, and *unc-33*  
489 mutants are not due increased growth cone size and protrusion. Furthermore, this suggests  
490 that the UNC-73 Rac GEF activity might inhibit protrusion by a mechanism distinct from  
491 restricting MT + end entry, possibly by affecting actin polymerization directly. Such a  
492 mechanism could involve the flavin monooxygenase (FMOs) FMO-1 and FMO-5, which  
493 were recently shown to act downstream of UNC-5 and activated Rac GTPases to inhibit VD  
494 growth cone protrusion (GUJAR *et al.* 2017). In *Drosophila*, the FMO-containing MICAL  
495 molecule causes actin depolymerization by directly oxidizing actin (HUNG *et al.* 2010; HUNG  
496 *et al.* 2011). The *C. elegans* genome does not encode a single MICAL-like molecule  
497 containing an FMO plus additional functional domains. In *C. elegans* FMOs might play an  
498 analogous role to MICAL in actin regulation and growth cone inhibition.  
499 Mutations in the Rho-specific GEF domain of *unc-73* led to a complex phenotype. Growth  
500 cones were slightly smaller with slightly increased filopodial length. F-actin polarity was  
501 unaffected, but excess EBP-2::GFP puncta were observed. This phenotype could reflect the  
502 role of RHO-1 in the growth cone, or could reflect that these mutations are not specific to the  
503 Rho GEF domain and might affect overall function of the molecule. In any event, these  
504 mutations display a distinct phenotype compared to *unc-73(rh40)*, which is specific to the  
505 Rac GEF activity of UNC-73.

506

### 507 **The Rac GTPases CED-10 and MIG-2 affect F-actin polarity and EBP-2::GFP**

508 **accumulation.** The Rac GEF activity of UNC-73/Trio was required for F-actin polarity but  
509 not EBP-2::GFP restriction. However, the *mig-2; ced-10* Rac double mutant displayed both  
510 F-actin polarity defects and excess EBP-2::GFP puncta (Figure 7), suggesting that Rac  
511 GTPases have an UNC-73/Trio Rac GEF activity-independent role in EBP-2::GFP restriction  
512 and thus possibly MT + end restriction from the growth cone. Possibly another Rac GEF  
513 regulates MIG-2 and CED-10 in MT + end restriction. Despite unpolarized F-actin and  
514 excess MT + ends, the growth cones in *mig-2; ced-10* double mutants have only subtly-  
515 increased filopodial protrusions, much weaker than *unc-73(rh40)*. This might be due to MIG-  
516 2 and CED-10 being required in both pro- and anti-protrusive activities, resulting in an  
517 intermediate effect on growth cone protrusion in the double mutant.  
518 *ced-10* and *mig-2* single mutants displayed F-actin polarity defects alone, but did not display  
519 excess EBP-2::GFP puncta accumulation. Thus, CED-10 and MIG-2 are individually  
520 required for F-actin polarity and act redundantly in MT + end restriction. Despite F-actin

521 polarity defects, protrusion of the *ced-10* and *mig-2* growth cones resembles wild-type. This  
522 could again be explained by their roles in both pro- and anti-protrusive activities.

523

524 **UNC-33/CRMP and UNC-44/Ankyrin are required to exclude MT+ -ends from the VD**

525 **growth cone.** Our previous work showed that the collapsin-response-mediating protein

526 UNC-33/CRMP and UNC-44/ankyrin are required for inhibition of protrusion by UNC-5-

527 UNC-40 and Rac GTPases. Here we show that UNC-33 and UNC-44, similar to UNC-5, are

528 required for F-actin polarity and to restrict MT + end accumulation in the growth cone.

529 CRMPs were first identified as molecules required for growth cone collapse induced by

530 semaphorin-3A through Plexin-A and Neuropilin-1 receptors (GOSHIMA *et al.* 1995;

531 TAKAHASHI *et al.* 1999). CRMP4 knockdown in cultured mammalian neurons led to

532 increased filopodial protrusion and axon branching (ALABED *et al.* 2007), consistent with our

533 findings of UNC-33/CRMP as an inhibitor of protrusion. However, hippocampal neurons

534 from a CRMP4 knock-out mouse exhibited decreased axon extension and growth cone size

535 (KHAZAEI *et al.* 2014).

536 CRMPs have various roles in actin and MT organization and function (KHAZAEI *et al.* 2014).

537 CRMP2 promotes microtubule assembly *in vitro* by interacting with tubulin heterodimers and

538 microtubules to regulate axonal growth and branching (FUKATA *et al.* 2002). CRMP2 also

539 binds to the kinesin-1 light chain subunit and acts as an adaptor for the transport of tubulin

540 heterodimers as well as the actin regulators Sra-1 and WAVE into axonal growth cones

541 (KAWANO *et al.* 2005; KIMURA *et al.* 2005). Furthermore, CRMP4 physically associates with

542 *in vitro* F-actin (ROSSLENBROICH *et al.* 2005). In cultured DRG neurons, CRMP1 colocalizes

543 to the actin cytoskeleton (HIGURASHI *et al.* 2012), and drives actin elongation in lamellipodia

544 formation in cultured epithelial cells (YU-KEMP *et al.* 2017). These studies indicate that

545 CRMPs can have both positive and negative effects on neuronal protrusion, and most of the

546 biochemical evidence indicates that CRMPs promote actin assembly and MT function. Our

547 results suggest that UNC-33/CRMP has a negative effect on growth cone protrusion and MT

548 entry into growth cones, consistent with the original finding of CRMPs as anti-protrusive

549 factors (GOSHIMA *et al.* 1995; TAKAHASHI *et al.* 1999). The role of UNC-44/ankyrin might be

550 to properly localize UNC-33/CRMP as previously described (MANIAR *et al.* 2012). Loss of

551 dorsal F-actin asymmetry and excess protrusion could be a secondary consequence of excess

552 MT accumulation in the growth cone, or could represent independent roles of UNC-

553 33/CRMP.

554 We have identified three aspects of VD growth cone morphology affected by *unc-5* mutants:  
555 excess protrusion; dorsal F-actin accumulation; and restriction of MT + ends from the growth  
556 cone. Neither excess MT + ends nor loss of dorsal F-actin polarity alone were sufficient to  
557 drive excess protrusion, as *unc-40; unc-5* and *ced-10; mig-2* double mutants display loss of  
558 F-actin polarity and excess MT + ends but not excess growth cone protrusion. Thus, an  
559 additional mechanism, possibly involving UNC-40, CED-10, MIG-2, and actin nucleators  
560 such as Arp2/3, UNC-115/abLIM, and UNC-34/Ena are required to drive protrusion  
561 downstream of F-actin polarity and MT + end entry.

562 Possibly, a dynamic interaction between MTs and actin, mediated by UNC-33/CRMP,  
563 controls MT accumulation in the growth cone during repulsive axon guidance mediated by  
564 UNC-6/Netrin. The interactions between actin and microtubules in growth cones *in vitro* is  
565 well-documented and complex (DENT *et al.* 2011; COLES AND BRADKE 2015), including the  
566 idea that actin retrograde flow removes MTs from the growth cone periphery due to physical  
567 linkage to actin undergoing retrograde flow (LIN AND FORSCHER 1995; LEE AND SUTER 2008;  
568 SCHAEFER *et al.* 2008; SHORT *et al.* 2016; TURNEY *et al.* 2016). An intriguing interpretation  
569 of our results, based upon those in cultured neurons, is that the UNC-6/Netrin signaling  
570 pathway we have described inhibits protrusion by maintaining MT attachment to actin,  
571 possibly via UNC-33/CRMP, and thus restriction of MTs from the growth cone. Growth cone  
572 dorsal advance could occur by regulated MT entry and interaction with the dorsal leading  
573 edge of the growth cone, possibly by interacting with polarized dorsal F-actin. Furthermore,  
574 we show that a pro-protrusive function of UNC-40/DCC and the Rac GTPases might act  
575 independently of UNC-5 to drive growth cone protrusion, normally at the dorsal leading  
576 edge.

577

578 **Conclusions.** Our results suggest that UNC-6/Netrin signaling coordinates growth cone F-  
579 actin accumulation, EBP-2::GFP accumulation, and protrusion to direct growth away from it.  
580 UNC-6/Netrin and UNC-5 have a role in polarizing the growth cone, visualized by dorsal F-  
581 actin accumulation, resulting in protrusion restricted to the dorsal leading edge. Furthermore,  
582 UNC-6/Netrin and UNC-40 stimulate protrusion at the dorsal leading edge, based on the  
583 establishment of polarity via UNC-5. This is similar to results in neurons with axons that  
584 grow ventrally toward UNC-6/Netrin (e.g. HSN), wherein UNC-6/Netrin and UNC-5  
585 regulate where UNC-40-mediated protrusion can occur in the neuron, in this case ventrally  
586 toward the site of UNC-6/Netrin (KULKARNI *et al.* 2013; YANG *et al.* 2014; LIMERICK *et al.*  
587 2018). These results in axons that grow toward UNC-6/Netrin, along with our results in

588 growth cones that grow away from UNC-6/Netrin, suggest a model of UNC-6/Netrin  
589 function involving growth cone polarization coupled with regulation of growth cone  
590 protrusion based on this polarity. Recent studies in the vertebrate spinal cord have shown that  
591 expression of Netrin-1 in the floorplate is dispensable for commissural axon ventral guidance,  
592 (DOMINICI *et al.* 2017; VARADARAJAN AND BUTLER 2017; VARADARAJAN *et al.* 2017;  
593 YAMAUCHI *et al.* 2017) and that contact-mediated interactions with ventricular cells  
594 expressing Netrin-1 are more important, consistent with a possible contact-mediated polarity  
595 role of Netrin. In any case, several outstanding questions about the polarization/protrusion  
596 model presented here remain. For example, how does UNC-6/Netrin result in polarized  
597 protrusive activities in the growth cone? Asymmetric localization of UNC-40 and/or UNC-5  
598 is an attractive idea, but UNC-40::GFP shows uniform association of the growth cone margin  
599 in VD growth cones and no asymmetric distribution (NORRIS *et al.* 2014). Also, once  
600 established, how is polarized protrusive activity maintained as the growth cone extends  
601 dorsally away from the UNC-6/Netrin source? Answers to these questions will be the subject  
602 of future study.

603 **Figure Legends**

604 **Figure 1. UNC-6 regulates growth cone protrusion. (A-B)** Graphs of the average growth  
605 cone area and filopodial length in wild-type and mutants, as described in (NORRIS AND  
606 LUNDQUIST 2011) (See Methods). **(C-E)** Fluorescence micrographs of VD growth cones with  
607 *Punc-25::gfp* expression from the transgene *juIs76*. Arrows point to the growth cone body,  
608 and arrowheads to filopodial protrusions. Scale bar: 5 $\mu$ m.

609

610 **Figure 2. Dorsally-polarized F-actin and EBP-2::GFP accumulation. (A)** VAB-  
611 10ABD::GFP accumulation at the dorsal edge of a wild-type VD growth cone (arrows).  
612 Ventral region of the growth cone with little VAB-10ABD::GFP accumulation (arrow heads).  
613 **(B)** mCherry growth cone volume marker. **(C)** Merge. Dorsal is up and anterior is left. Scale  
614 bar: 5 $\mu$ m in A-C. **(D-G)**. A representative line plot of a wild-type VD growth cone as  
615 previously described (NORRIS AND LUNDQUIST 2011). **(D)** A graph representing the pixel  
616 intensity ratio (arbitrary units) of GFP/mCherry (y-axis) against the distance from the dorsal  
617 growth cone edge. **(E)** For each growth cone, five lines were drawn as shown and the pixel  
618 intensity ratios were averaged (error bars represent standard deviation). **(F)** The average  
619 dorsal-to-ventral ratio of GFP/mCherry in wild-type from multiple growth cones ( $\geq 15$ ). Error  
620 bars represent the standard error of the mean of the ratios from different growth cones. **(G)**  
621 Growth cones were divided into dorsal and ventral halves, and the average intensity ratio of  
622 VAB-10ABD::GFP/mCherry was determined for each half and represented in (F). The scale  
623 bars in (E) and (G) represent 5 $\mu$ m. **(H)** A wild-type VD growth cone with *Punc-25::ebp-*  
624 *2::gfp* expression from the *lqIs279* transgene. The extent of the growth cone body is  
625 highlighted by a dashed line. Arrows point to EBP-2::GFP puncta in the axons of a DD  
626 neuron. Arrowheads point to puncta in the VD growth cone. VNC is the ventral nerve cord,  
627 and DNC is the dorsal nerve cord. Scale bar: 5 $\mu$ m. **(I)** Box-and-whiskers plot of the number  
628 of EBP-2::GFP puncta in the growth cones of different genotypes ( $\geq 25$  growth cones for each  
629 genotype). The grey boxes represent the upper and lower quartiles, and error bars represent  
630 the upper and lower extreme values. Dots represent outliers. *p* values were assigned using the  
631 two-sided *t*-test with unequal variance. **(J-L)** Growth cones of different genotypes, with  
632 EBP-2::GFP puncta indicated with arrows. Dashed lines indicate the growth cone perimeter.  
633 Dorsal is up and anterior is left. Scale bar: 5 $\mu$ m.

634

635 **Figure 3. Dorsal F-actin polarity is lost in *unc-5* and *unc-6* mutants. (A)** The average  
636 dorsal-to-ventral ratio of GFP/mCherry from multiple growth cones ( $\geq 12$ ) from different

637 genotypes as described in Figure 1. Asterisks (\*) indicate the significance of difference  
638 between wild-type and the mutant phenotype ( $*p < 0.05$ ) (two-tailed *t*-test with unequal  
639 variance between the ratios of multiple growth cones of each genotype). Error bars represent  
640 the standard error of the mean **(B-D)** Representative merged images of VD growth cones with  
641 cytoplasmic mCherry in red (a volumetric marker) and the VAB-10ABD::GFP in green.  
642 Areas of overlap are yellow. Dashed lines indicate the perimeter of the growth cone. Scale  
643 bar: 5  $\mu$ m.

644

645 **Figure 4. EBP-2::GFP puncta accumulation and loss of growth cone F-actin polarity in**  
646 ***unc-5* mutants is not dependent on functional UNC-6 or UNC-40.** **(A)** The average dorsal-  
647 to-ventral ratio of GFP/mCherry from multiple growth cones in wild-type and mutant animals  
648 as described in Figure 3. **(B-D)** Representative images of VD growth cones with cytoplasmic  
649 mCherry in red (a volumetric marker) and the VAB-10ABD::GFP in green as described in  
650 Figure 1. Scale bar: 5  $\mu$ m. **(E)** Quantification of average number of EBP-2::GFP puncta in  
651 wild-type and mutant animals as described in Figure 2. **(F-H)** Fluorescence micrographs of  
652 EBP-2::GFP expression in VD growth cones. Arrows point to EBP-2::GFP puncta Scale bar:  
653 5 $\mu$ m

654

655 **Figure 5. UNC-73/Trio alleles have distinct effects on VD growth cone protrusion.** **(A)** A  
656 diagram of the full-length UNC-73/Trio molecule. The *rh40*, *ce362*, and *ev802* mutations are  
657 indicated. **(B)** Graphs of the average growth cone area and filopodial length in wild-type and  
658 *unc-73* mutants, as described in (NORRIS AND LUNDQUIST 2011) (See Methods). Significance  
659 was determined by a two-sided *t*-test with unequal variance. **(D-G)** Fluorescence micrographs  
660 of VD growth cones with *Punc-25::gfp* expression from the transgene *juIs76*. Arrows point to  
661 the growth cone body, and arrowheads to filopodial protrusions. Scale bar: 5 $\mu$ m.

662

663 **Figure 6. The Rac GEF activity of UNC-73/Trio affects F-actin polarity but not EBP-**  
664 **2::GFP puncta accumulation.** **(A)** The average dorsal-to-ventral ratio of GFP/mCherry  
665 from multiple growth cones in wild-type and mutant animals as described in Figures 1 and 3.  
666 **(C-E)** Representative merged images of VD growth cones with cytoplasmic mCherry in red  
667 (a volumetric marker) and the VAB-10ABD::GFP in green, as in Figure 1. Areas of overlap  
668 are yellow (arrows). Scale bar: 5  $\mu$ m. **(F)** Quantification of average number of EBP-2::GFP  
669 puncta in wild-type and mutant animals as described in Figure 2. **(G-J)** Fluorescence  
670 micrographs of VD growth cones showing EBP-2::GFP puncta (arrows). Scale bar: 5 $\mu$ m.

671

672 **Figure 7. The Rac GTPases CED-10 and MIG-2 individually affect F-actin polarity and**

673 **are redundant for EBP-2::GFP puncta accumulation. (A)** The average dorsal-to-ventral

674 ratio of GFP/mCherry from multiple growth cones in wild-type and mutant animals as

675 described in Figures 1 and 3. **(B-D)** Representative merged images of VD growth cones with

676 cytoplasmic mCherry in red (a volumetric marker) and the VAB-10ABD::GFP in green as in

677 Figure 1. Scale bar: 5  $\mu$ m. **(E)** Quantification of average number of EBP-2::GFP puncta in

678 wild-type and mutant animals as described in Figure 2. **(F-H)** Fluorescence micrographs of

679 VD growth cones with EBP-2::GFP puncta indicated arrows. Scale bar: 5 $\mu$ m.

680

681 **Figure 8. *unc-33* and *unc-44* mutants disrupt F-actin polarity and affect EBP-2::GFP**

682 **puncta accumulation. (A)** The average dorsal-to-ventral ratio of GFP/mCherry from

683 multiple growth cones in wild-type and mutant animals as described in Figure 3. **(B-D)**

684 Representative merged images of VD growth cones with cytoplasmic mCherry in red (a

685 volumetric marker) and the VAB-10ABD::GFP in green, as in Figure 1. Scale bar: 5  $\mu$ m.

686 **(E)** Quantification of average number of EBP-2::GFP puncta in wild-type and mutant animals

687 as in Figure 2. **(F-H)** Fluorescence micrographs of VD growth cones with EBP-2::GFP

688 puncta indicate by arrows. Scale bar: 5 $\mu$ m.

689

690 **Figure 9. Constitutive activation of UNC-40, UNC-5, CED-10 and MIG-2 affects F-actin**

691 **polarity and EBP-2 distribution. (A)** The average dorsal-to-ventral ratio of GFP/mCherry

692 from multiple growth cones in wild-type and mutant animals as described in Figure 3. **(B-D)**

693 Representative merged images of VD growth cones with cytoplasmic mCherry in red (a

694 volumetric marker) and the VAB-10ABD::GFP in green. Scale bar: 5  $\mu$ m. **(E)** Quantification

695 of average number of EBP-2::GFP puncta in wild-type and mutant animals as described in

696 Figure 2. **(F-H)** Fluorescence micrographs of VD growth cones with EBP-2::GFP puncta

697 indicated by arrows. Scale bar: 5 $\mu$ m.

698

699 **Figure 10. A model of the roles of UNC-5 and UNC-40 in growth cone outgrowth.** Our

700 results indicate that UNC-6/Netrin controls multiple, complex aspects of growth cone

701 behavior and morphology during growth away from it. UNC-6 polarizes the growth cone via

702 UNC-5, including F-actin accumulation and protrusion localized to the dorsal leading edge

703 away from the UNC-6 source. UNC-6 also regulates the extent of growth cone protrusion. It

704 inhibits protrusion via UNC-5, possibly by restricting MT + end accumulation in the growth



705 cone. Protrusion can be inhibited independently of MT + ends, possibly via an actin-based  
706 mechanism involving the flavin monooxygenases (FMOs). UNC-6/Netrin can also drive  
707 growth cone protrusion via UNC-40/DCC. These anti- and pro-protrusive activities of UNC-  
708 6/Netrin might act asymmetrically in the growth cone, possible established by the earlier role  
709 of UNC-6/Netrin in polarizing the growth cone.

## 710 References

- 711 Alabed, Y. Z., M. Pool, S. Ong Tone and A. E. Fournier, 2007 Identification of CRMP4 as a convergent  
712 regulator of axon outgrowth inhibition. *J Neurosci* 27: 1702-1711.
- 713 Asakura, T., K. Ogura and Y. Goshima, 2007 UNC-6 expression by the vulval precursor cells of  
714 *Caenorhabditis elegans* is required for the complex axon guidance of the HSN neurons. *Dev*  
715 *Biol* 304: 800-810.
- 716 Bateman, J., H. Shu and D. Van Vactor, 2000 The guanine nucleotide exchange factor trio mediates  
717 axonal development in the *Drosophila* embryo. *Neuron* 26: 93-106.
- 718 Bernadskaya, Y. Y., A. Wallace, J. Nguyen, W. A. Mohler and M. C. Soto, 2012 UNC-40/DCC, SAX-  
719 3/Robo, and VAB-1/Eph polarize F-actin during embryonic morphogenesis by regulating the  
720 WAVE/SCAR actin nucleation complex. *PLoS Genet* 8: e1002863.
- 721 Boshier, J. M., B. S. Hahn, R. Legouis, S. Sookhareea, R. M. Weimer *et al.*, 2003 The *Caenorhabditis*  
722 *elegans* vab-10 spectraplakins isoforms protect the epidermis against internal and external  
723 forces. *J Cell Biol* 161: 757-768.
- 724 Buck, K. B., and J. Q. Zheng, 2002 Growth cone turning induced by direct local modification of  
725 microtubule dynamics. *J Neurosci* 22: 9358-9367.
- 726 Chan, S. S., H. Zheng, M. W. Su, R. Wilk, M. T. Killeen *et al.*, 1996 UNC-40, a *C. elegans* homolog of  
727 DCC (Deleted in Colorectal Cancer), is required in motile cells responding to UNC-6 netrin  
728 cues. *Cell* 87: 187-195.
- 729 Coles, C. H., and F. Bradke, 2015 Coordinating neuronal actin-microtubule dynamics. *Curr Biol* 25:  
730 R677-691.
- 731 Demarco, R. S., E. C. Struckhoff and E. A. Lundquist, 2012 The Rac GTP exchange factor TIAM-1 acts  
732 with CDC-42 and the guidance receptor UNC-40/DCC in neuronal protrusion and axon  
733 guidance. *PLoS Genet* 8: e1002665.
- 734 Dent, E. W., and F. B. Gertler, 2003 Cytoskeletal dynamics and transport in growth cone motility and  
735 axon guidance. *Neuron* 40: 209-227.
- 736 Dent, E. W., S. L. Gupton and F. B. Gertler, 2011 The growth cone cytoskeleton in axon outgrowth  
737 and guidance. *Cold Spring Harb Perspect Biol* 3.
- 738 Dent, E. W., and K. Kalil, 2001 Axon branching requires interactions between dynamic microtubules  
739 and actin filaments. *J Neurosci* 21: 9757-9769.
- 740 Dominici, C., J. A. Moreno-Bravo, S. R. Puiggros, Q. Rappeneau, N. Rama *et al.*, 2017 Floor-plate-  
741 derived netrin-1 is dispensable for commissural axon guidance. *Nature* 545: 350-354.
- 742 Forscher, P., and S. J. Smith, 1988 Actions of cytochalasins on the organization of actin filaments and  
743 microtubules in a neuronal growth cone. *J Cell Biol* 107: 1505-1516.
- 744 Fukata, Y., T. J. Itoh, T. Kimura, C. Menager, T. Nishimura *et al.*, 2002 CRMP-2 binds to tubulin  
745 heterodimers to promote microtubule assembly. *Nat Cell Biol* 4: 583-591.
- 746 Gallo, G., and P. C. Letourneau, 2004 Regulation of growth cone actin filaments by guidance cues. *J*  
747 *Neurobiol* 58: 92-102.
- 748 Gitai, Z., T. W. Yu, E. A. Lundquist, M. Tessier-Lavigne and C. I. Bargmann, 2003 The netrin receptor  
749 UNC-40/DCC stimulates axon attraction and outgrowth through enabled and, in parallel, Rac  
750 and UNC-115/ABLIM. *Neuron* 37: 53-65.
- 751 Goshima, Y., F. Nakamura, P. Strittmatter and S. M. Strittmatter, 1995 Collapsin-induced growth  
752 cone collapse mediated by an intracellular protein related to UNC-33. *Nature* 376: 509-514.
- 753 Gujar, M. R., A. M. Stricker and E. A. Lundquist, 2017 Flavin monooxygenases regulate  
754 *Caenorhabditis elegans* axon guidance and growth cone protrusion with UNC-6/Netrin  
755 signaling and Rac GTPases. *PLoS Genet* 13: e1006998.
- 756 Hedgecock, E. M., J. G. Culotti and D. H. Hall, 1990 The *unc-5*, *unc-6*, and *unc-40* genes guide  
757 circumferential migrations of pioneer axons and mesodermal cells on the epidermis in *C.*  
758 *elegans*. *Neuron* 4: 61-85.
- 759 Higurashi, M., M. Iketani, K. Takei, N. Yamashita, R. Aoki *et al.*, 2012 Localized role of CRMP1 and  
760 CRMP2 in neurite outgrowth and growth cone steering. *Dev Neurobiol* 72: 1528-1540.

- 761 Hong, K., L. Hinck, M. Nishiyama, M. M. Poo, M. Tessier-Lavigne *et al.*, 1999 A ligand-gated  
762 association between cytoplasmic domains of UNC5 and DCC family receptors converts  
763 netrin-induced growth cone attraction to repulsion. *Cell* 97: 927-941.
- 764 Hu, S., T. Pawson and R. M. Steven, 2011 UNC-73/trio RhoGEF-2 activity modulates *Caenorhabditis*  
765 *elegans* motility through changes in neurotransmitter signaling upstream of the GSA-  
766 1/Galphas pathway. *Genetics* 189: 137-151.
- 767 Huang, H., T. Yang, Q. Shao, T. Majumder, K. Mell *et al.*, 2018 Human TUBB3 Mutations Disrupt  
768 Netrin Attractive Signaling. *Neuroscience* 374: 155-171.
- 769 Hung, R. J., C. W. Pak and J. R. Terman, 2011 Direct redox regulation of F-actin assembly and  
770 disassembly by Mical. *Science* 334: 1710-1713.
- 771 Hung, R. J., U. Yazdani, J. Yoon, H. Wu, T. Yang *et al.*, 2010 Mical links semaphorins to F-actin  
772 disassembly. *Nature* 463: 823-827.
- 773 Kawano, Y., T. Yoshimura, D. Tsuboi, S. Kawabata, T. Kaneko-Kawano *et al.*, 2005 CRMP-2 is involved  
774 in kinesin-1-dependent transport of the Sra-1/WAVE1 complex and axon formation. *Mol Cell*  
775 *Biol* 25: 9920-9935.
- 776 Khazaei, M. R., M. P. Girouard, R. Alchini, S. Ong Tone, T. Shimada *et al.*, 2014 Collapsin response  
777 mediator protein 4 regulates growth cone dynamics through the actin and microtubule  
778 cytoskeleton. *J Biol Chem* 289: 30133-30143.
- 779 Kimura, T., H. Watanabe, A. Iwamatsu and K. Kaibuchi, 2005 Tubulin and CRMP-2 complex is  
780 transported via Kinesin-1. *J Neurochem* 93: 1371-1382.
- 781 Knobel, K. M., E. M. Jorgensen and M. J. Bastiani, 1999 Growth cones stall and collapse during axon  
782 outgrowth in *Caenorhabditis elegans*. *Development* 126: 4489-4498.
- 783 Kozlowski, C., M. Srayko and F. Nedelec, 2007 Cortical microtubule contacts position the spindle in *C.*  
784 *elegans* embryos. *Cell* 129: 499-510.
- 785 Kulkarni, G., Z. Xu, A. M. Mohamed, H. Li, X. Tang *et al.*, 2013 Experimental evidence for UNC-6  
786 (netrin) axon guidance by stochastic fluctuations of intracellular UNC-40 (DCC) outgrowth  
787 activity. *Biol Open* 2: 1300-1312.
- 788 Kurup, N., D. Yan, A. Goncharov and Y. Jin, 2015 Dynamic microtubules drive circuit rewiring in the  
789 absence of neurite remodeling. *Curr Biol* 25: 1594-1605.
- 790 Lee, A. C., and D. M. Suter, 2008 Quantitative analysis of microtubule dynamics during adhesion-  
791 mediated growth cone guidance. *Dev Neurobiol* 68: 1363-1377.
- 792 Leung-Hagesteijn, C., Spence, A.M., Stern, B.D., Zhou, Y., Su, M.-W., Hedgecock, E.M., Culotti, J.G.,  
793 1992 UNC-5, a transmembrane protein with immunoglobulin and thrombospondin type I  
794 domains, guides cell and pioneer axon migrations. *Cell* 71: 289-299.
- 795 Levy-Strumpf, N., and J. G. Culotti, 2014 Netrins and Wnts function redundantly to regulate antero-  
796 posterior and dorso-ventral guidance in *C. elegans*. *PLoS Genet* 10: e1004381.
- 797 Limerick, G., X. Tang, W. S. Lee, A. Mohamed, A. Al-Aamiri *et al.*, 2018 A Statistically-Oriented  
798 Asymmetric Localization (SOAL) Model for Neuronal Outgrowth Patterning by  
799 *Caenorhabditis elegans* UNC-5 (UNC5) and UNC-40 (DCC) Netrin Receptors. *Genetics* 208:  
800 245-272.
- 801 Lin, C. H., and P. Forscher, 1995 Growth cone advance is inversely proportional to retrograde F-actin  
802 flow. *Neuron* 14: 763-771.
- 803 Lowery, L. A., and D. Van Vactor, 2009 The trip of the tip: understanding the growth cone machinery.  
804 *Nat Rev Mol Cell Biol* 10: 332-343.
- 805 Lundquist, E. A., 2003 Rac proteins and the control of axon development. *Curr Opin Neurobiol* 13:  
806 384-390.
- 807 Lundquist, E. A., P. W. Reddien, E. Hartwig, H. R. Horvitz and C. I. Bargmann, 2001 Three *C. elegans*  
808 Rac proteins and several alternative Rac regulators control axon guidance, cell migration and  
809 apoptotic cell phagocytosis. *Development* 128: 4475-4488.

- 810 MacNeil, L. T., W. R. Hardy, T. Pawson, J. L. Wrana and J. G. Culotti, 2009 UNC-129 regulates the  
811 balance between UNC-40 dependent and independent UNC-5 signaling pathways. *Nat*  
812 *Neurosci* 12: 150-155.
- 813 Maniar, T. A., M. Kaplan, G. J. Wang, K. Shen, L. Wei *et al.*, 2012 UNC-33 (CRMP) and ankyrin  
814 organize microtubules and localize kinesin to polarize axon-dendrite sorting. *Nat Neurosci*  
815 15: 48-56.
- 816 McMullan, R., A. Anderson and S. Nurrish, 2012 Behavioral and immune responses to infection  
817 require Galphaq- RhoA signaling in *C. elegans*. *PLoS Pathog* 8: e1002530.
- 818 Mello, C., and A. Fire, 1995 DNA transformation. *Methods Cell Biol* 48: 451-482.
- 819 Mortimer, D., T. Fothergill, Z. Pujic, L. J. Richards and G. J. Goodhill, 2008 Growth cone chemotaxis.  
820 *Trends Neurosci*.
- 821 Norris, A. D., J. O. Dyer and E. A. Lundquist, 2009 The Arp2/3 complex, UNC-115/abLIM, and UNC-  
822 34/Enabled regulate axon guidance and growth cone filopodia formation in *Caenorhabditis*  
823 *elegans*. *Neural Dev* 4: 38.
- 824 Norris, A. D., and E. A. Lundquist, 2011 UNC-6/netrin and its receptors UNC-5 and UNC-40/DCC  
825 modulate growth cone protrusion in vivo in *C. elegans*. *Development* 138: 4433-4442.
- 826 Norris, A. D., L. Sundararajan, D. E. Morgan, Z. J. Roberts and E. A. Lundquist, 2014 The UNC-6/Netrin  
827 receptors UNC-40/DCC and UNC-5 inhibit growth cone filopodial protrusion via UNC-73/Trio,  
828 Rac-like GTPases and UNC-33/CRMP. *Development* 141: 4395-4405.
- 829 Omotade, O. F., S. L. Pollitt and J. Q. Zheng, 2017 Actin-based growth cone motility and guidance.  
830 *Mol Cell Neurosci*.
- 831 Pak, C. W., K. C. Flynn and J. R. Bamberg, 2008 Actin-binding proteins take the reins in growth cones.  
832 *Nat Rev Neurosci* 9: 136-147.
- 833 Patel, F. B., Y. Y. Bernadskaya, E. Chen, A. Jobanputra, Z. Pooladi *et al.*, 2008 The WAVE/SCAR  
834 complex promotes polarized cell movements and actin enrichment in epithelia during *C.*  
835 *elegans* embryogenesis. *Dev Biol* 324: 297-309.
- 836 Qu, C., T. Dwyer, Q. Shao, T. Yang, H. Huang *et al.*, 2013 Direct binding of TUBB3 with DCC couples  
837 netrin-1 signaling to intracellular microtubule dynamics in axon outgrowth and guidance. *J*  
838 *Cell Sci* 126: 3070-3081.
- 839 Ren, Y., and D. M. Suter, 2016 Increase in Growth Cone Size Correlates with Decrease in Neurite  
840 Growth Rate. *Neural Plast* 2016: 3497901.
- 841 Rosslénbroich, V., L. Dai, S. L. Baader, A. A. Noegel, V. Gieselmann *et al.*, 2005 Collapsin response  
842 mediator protein-4 regulates F-actin bundling. *Exp Cell Res* 310: 434-444.
- 843 Sabry, J. H., T. P. O'Connor, L. Evans, A. Toroian-Raymond, M. Kirschner *et al.*, 1991 Microtubule  
844 behavior during guidance of pioneer neuron growth cones in situ. *J Cell Biol* 115: 381-395.
- 845 Schaefer, A. W., V. T. Schoonderwoert, L. Ji, N. Mederios, G. Danuser *et al.*, 2008 Coordination of  
846 actin filament and microtubule dynamics during neurite outgrowth. *Dev Cell* 15: 146-162.
- 847 Shakir, M. A., J. S. Gill and E. A. Lundquist, 2006 Interactions of UNC-34 Enabled with Rac GTPases  
848 and the NIK kinase MIG-15 in *Caenorhabditis elegans* axon pathfinding and neuronal  
849 migration. *Genetics* 172: 893-913.
- 850 Shakir, M. A., K. Jiang, E. C. Struckhoff, R. S. Demarco, F. B. Patel *et al.*, 2008 The Arp2/3 Activators  
851 WAVE and WASP Have Distinct Genetic Interactions With Rac GTPases in *Caenorhabditis*  
852 *elegans* Axon Guidance. *Genetics* 179: 1957-1971.
- 853 Shao, Q., T. Yang, H. Huang, F. Alarmanazi and G. Liu, 2017 Uncoupling of UNC5C with Polymerized  
854 TUBB3 in Microtubules Mediates Netrin-1 Repulsion. *J Neurosci* 37: 5620-5633.
- 855 Short, C. A., E. A. Suarez-Zayas and T. M. Gomez, 2016 Cell adhesion and invasion mechanisms that  
856 guide developing axons. *Curr Opin Neurobiol* 39: 77-85.
- 857 Spencer, A. G., S. Orita, C. J. Malone and M. Han, 2001 A RHO GTPase-mediated pathway is required  
858 during P cell migration in *Caenorhabditis elegans*. *Proc Natl Acad Sci U S A* 98: 13132-13137.

- 859 Srayko, M., A. Kaya, J. Stamford and A. A. Hyman, 2005 Identification and characterization of factors  
860 required for microtubule growth and nucleation in the early *C. elegans* embryo. *Dev Cell* 9:  
861 223-236.
- 862 Steven, R., T. J. Kubiseski, H. Zheng, S. Kulkarni, J. Mancillas *et al.*, 1998 UNC-73 activates the Rac  
863 GTPase and is required for cell and growth cone migrations in *C. elegans*. *Cell* 92: 785-795.
- 864 Steven, R., L. Zhang, J. Culotti and T. Pawson, 2005 The UNC-73/Trio RhoGEF-2 domain is required in  
865 separate isoforms for the regulation of pharynx pumping and normal neurotransmission in  
866 *C. elegans*. *Genes Dev* 19: 2016-2029.
- 867 Struckhoff, E. C., and E. A. Lundquist, 2003 The actin-binding protein UNC-115 is an effector of Rac  
868 signaling during axon pathfinding in *C. elegans*. *Development* 130: 693-704.
- 869 Takahashi, T., A. Fournier, F. Nakamura, L. H. Wang, Y. Murakami *et al.*, 1999 Plexin-neuropilin-1  
870 complexes form functional semaphorin-3A receptors. *Cell* 99: 59-69.
- 871 Tanaka, E., T. Ho and M. W. Kirschner, 1995 The role of microtubule dynamics in growth cone  
872 motility and axonal growth. *J Cell Biol* 128: 139-155.
- 873 Terman, J. R., T. Mao, R. J. Pasterkamp, H. H. Yu and A. L. Kolodkin, 2002 MICALs, a family of  
874 conserved flavoprotein oxidoreductases, function in plexin-mediated axonal repulsion. *Cell*  
875 109: 887-900.
- 876 Tessier-Lavigne, M., and C. S. Goodman, 1996 The molecular biology of axon guidance. *Science* 274:  
877 1123-1133.
- 878 Turney, S. G., M. Ahmed, I. Chandrasekar, R. B. Wysolmerski, Z. M. Goeckeler *et al.*, 2016 Nerve  
879 growth factor stimulates axon outgrowth through negative regulation of growth cone  
880 actomyosin restraint of microtubule advance. *Mol Biol Cell* 27: 500-517.
- 881 Varadarajan, S. G., and S. J. Butler, 2017 Netrin1 establishes multiple boundaries for axon growth in  
882 the developing spinal cord. *Dev Biol* 430: 177-187.
- 883 Varadarajan, S. G., J. H. Kong, K. D. Phan, T. J. Kao, S. C. Panaitof *et al.*, 2017 Netrin1 Produced by  
884 Neural Progenitors, Not Floor Plate Cells, Is Required for Axon Guidance in the Spinal Cord.  
885 *Neuron* 94: 790-799 e793.
- 886 Vitriol, E. A., and J. Q. Zheng, 2012 Growth cone travel in space and time: the cellular ensemble of  
887 cytoskeleton, adhesion, and membrane. *Neuron* 73: 1068-1081.
- 888 Wadsworth, W. G., H. Bhatt and E. M. Hedgecock, 1996 Neuroglia and pioneer neurons express  
889 UNC-6 to provide global and local netrin cues for guiding migrations in *C. elegans*. *Neuron*  
890 16: 35-46.
- 891 Wang, Z., L. M. Linden, K. M. Naegeli, J. W. Ziel, Q. Chi *et al.*, 2014 UNC-6 (netrin) stabilizes  
892 oscillatory clustering of the UNC-40 (DCC) receptor to orient polarity. *J Cell Biol* 206: 619-  
893 633.
- 894 Williams, S. L., S. Lutz, N. K. Charlie, C. Vettel, M. Ailion *et al.*, 2007 Trio's Rho-specific GEF domain is  
895 the missing Galpha q effector in *C. elegans*. *Genes Dev* 21: 2731-2746.
- 896 Wu, Y. C., T. W. Cheng, M. C. Lee and N. Y. Weng, 2002 Distinct rac activation pathways control  
897 *Caenorhabditis elegans* cell migration and axon outgrowth. *Dev Biol* 250: 145-155.
- 898 Yamauchi, K., M. Yamazaki, M. Abe, K. Sakimura, H. Lickert *et al.*, 2017 Netrin-1 Derived from the  
899 Ventricular Zone, but not the Floor Plate, Directs Hindbrain Commissural Axons to the  
900 Ventral Midline. *Sci Rep* 7: 11992.
- 901 Yan, J., D. L. Chao, S. Toba, K. Koyasako, T. Yasunaga *et al.*, 2013 Kinesin-1 regulates dendrite  
902 microtubule polarity in *Caenorhabditis elegans*. *Elife* 2: e00133.
- 903 Yang, Y., W. S. Lee, X. Tang and W. G. Wadsworth, 2014 Extracellular matrix regulates UNC-6 (netrin)  
904 axon guidance by controlling the direction of intracellular UNC-40 (DCC) outgrowth activity.  
905 *PLoS One* 9: e97258.
- 906 Yu-Kemp, H. C., J. P. Kemp, Jr. and W. M. Brieher, 2017 CRMP-1 enhances EVL-mediated actin  
907 elongation to build lamellipodia and the actin cortex. *J Cell Biol* 216: 2463-2479.
- 908 Zhou, F. Q., and C. S. Cohan, 2004 How actin filaments and microtubules steer growth cones to their  
909 targets. *J Neurobiol* 58: 84-91.

910 Zhou, F. Q., C. M. Waterman-Storer and C. S. Cohan, 2002 Focal loss of actin bundles causes  
911 microtubule redistribution and growth cone turning. *J Cell Biol* 157: 839-849.

912

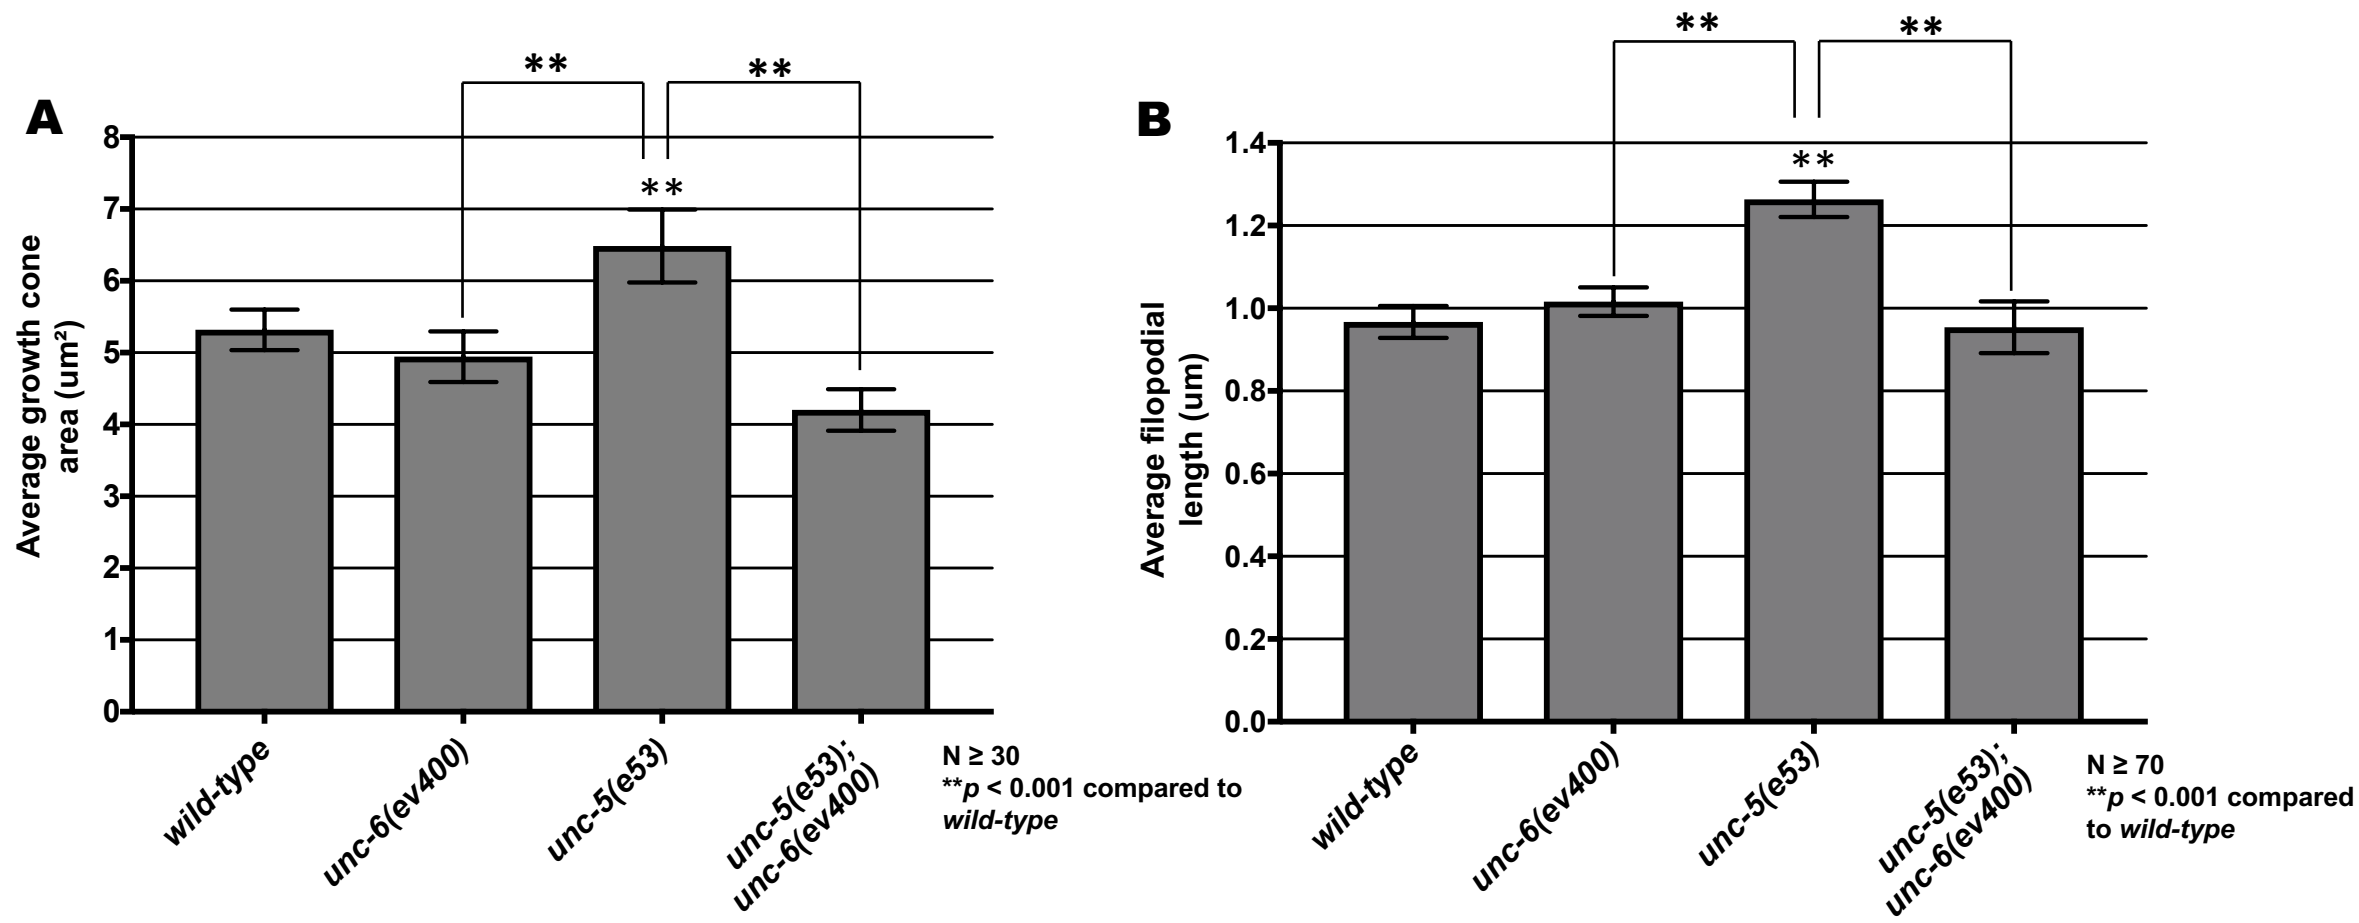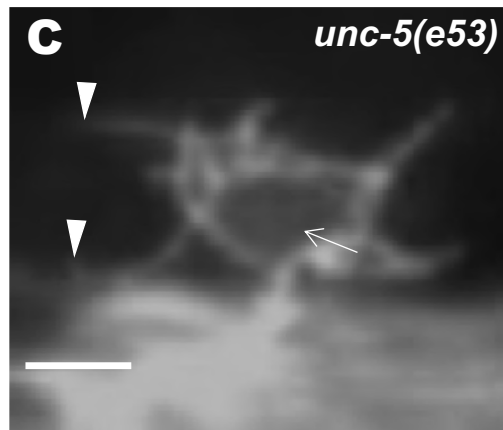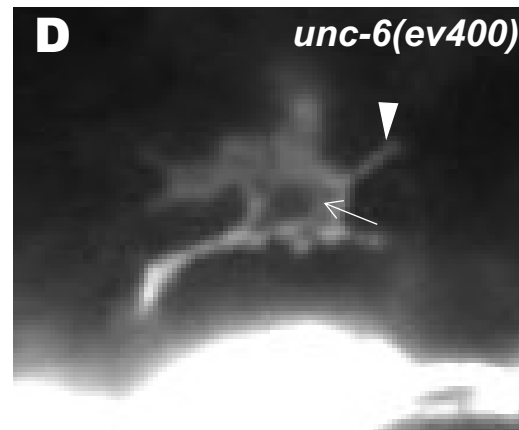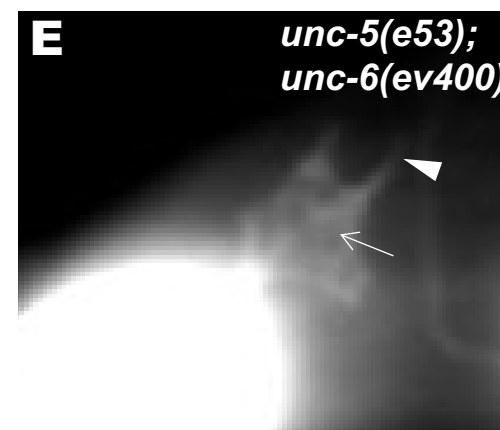

**Fig. 1**

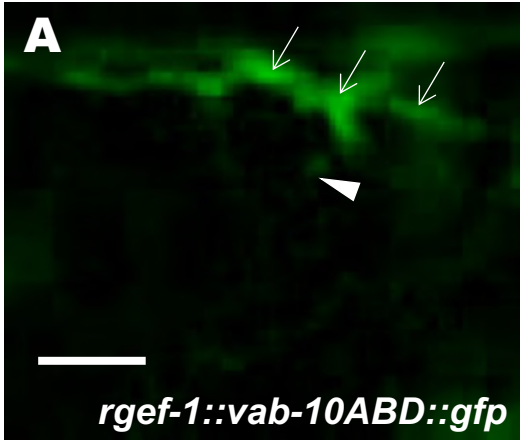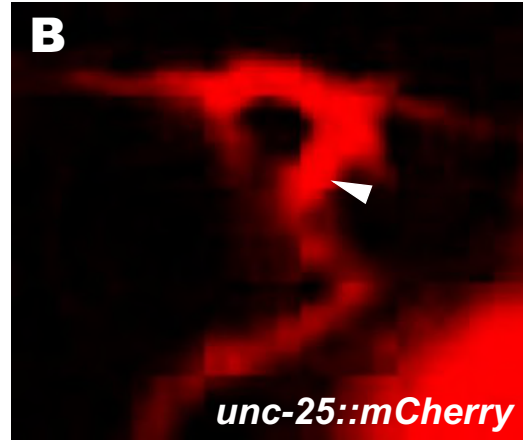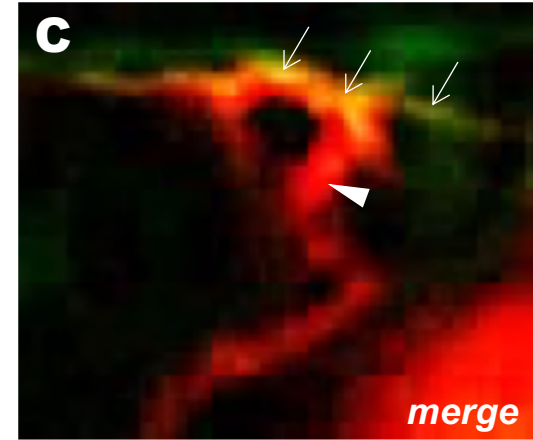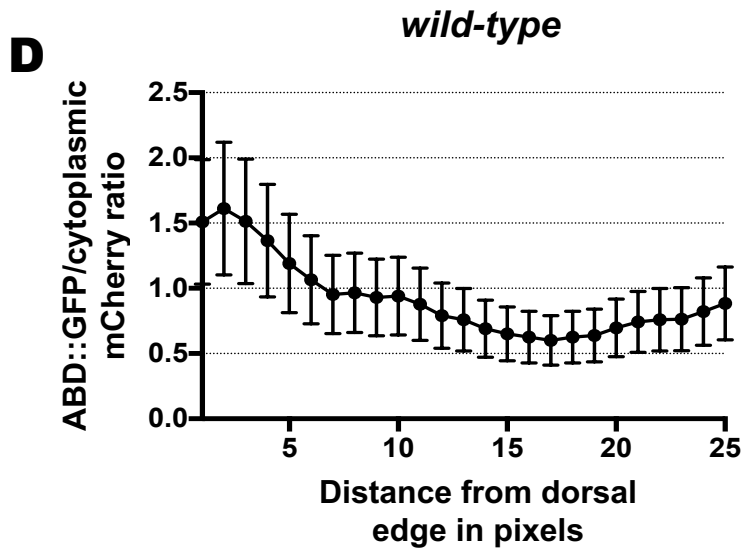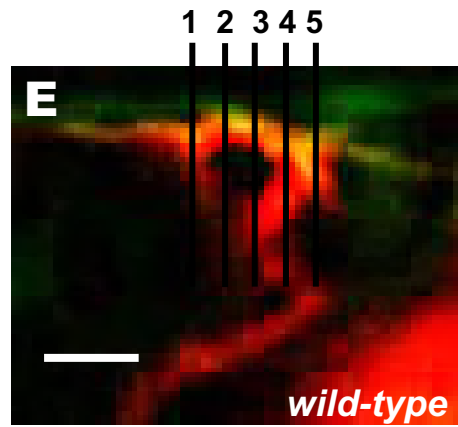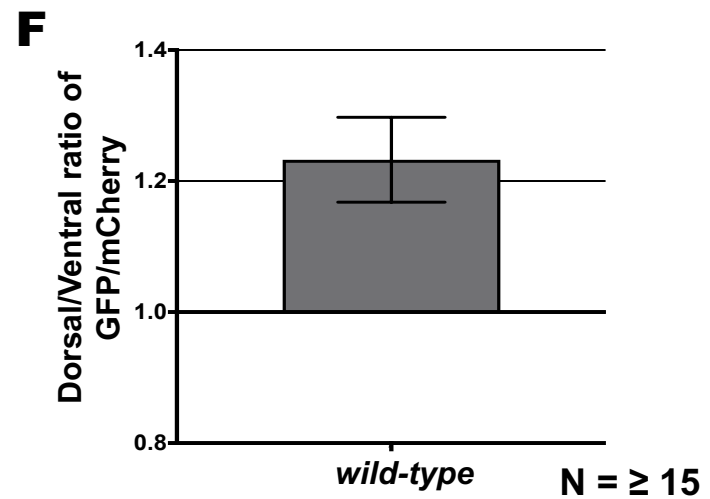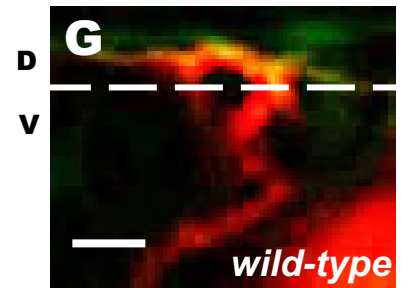

**Fig. 2**



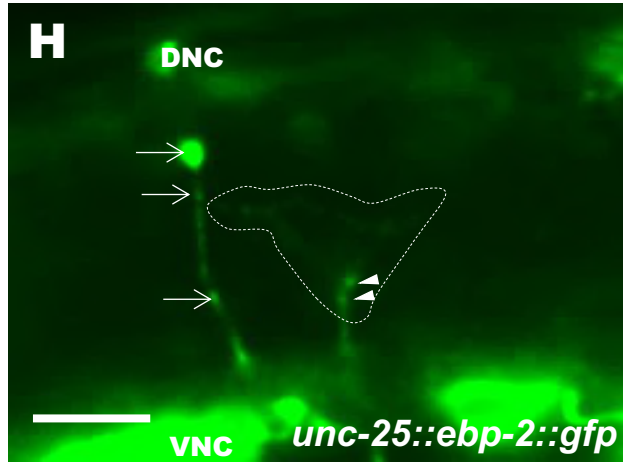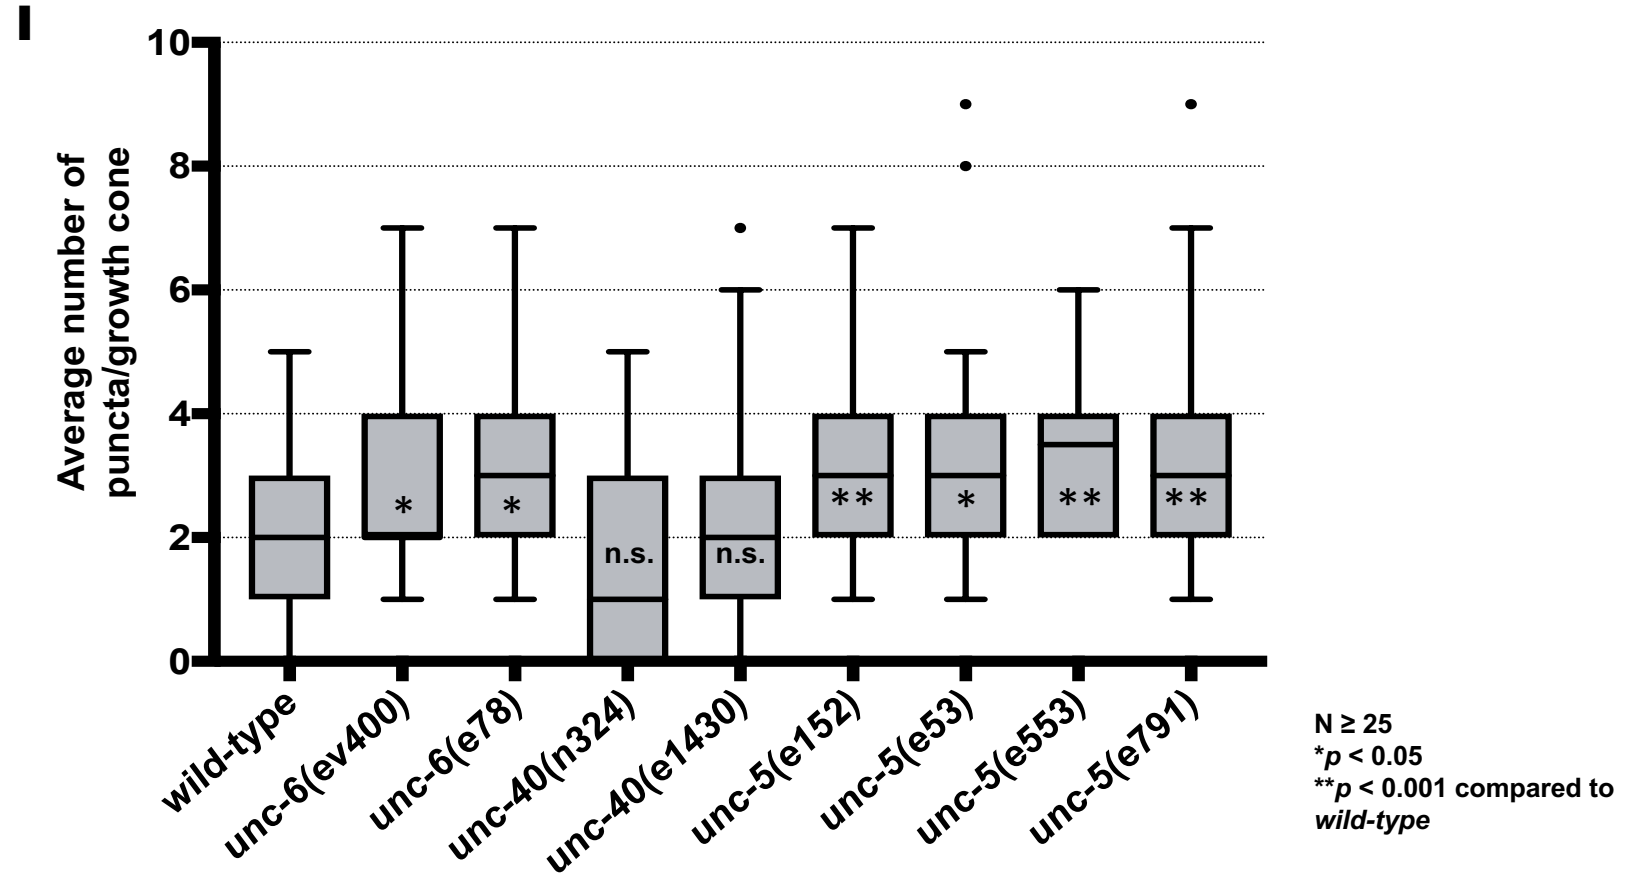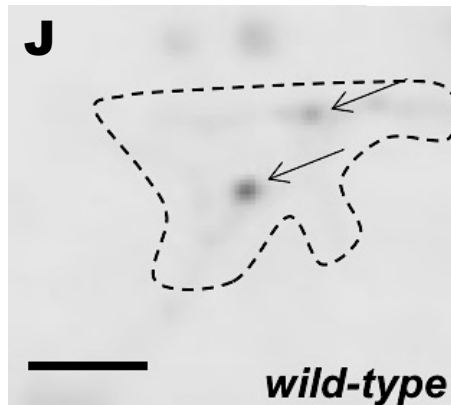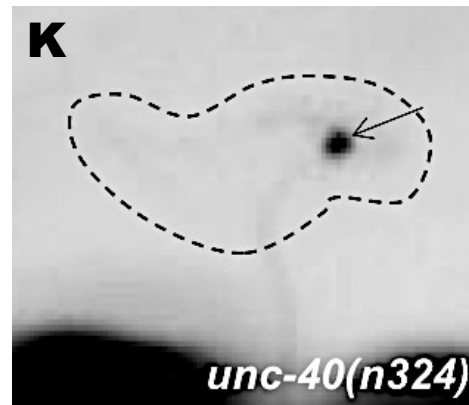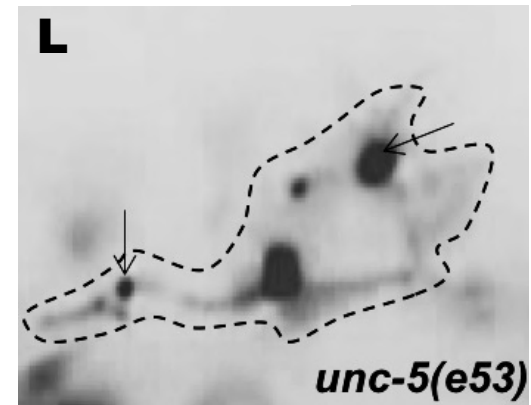

**Fig. 2**

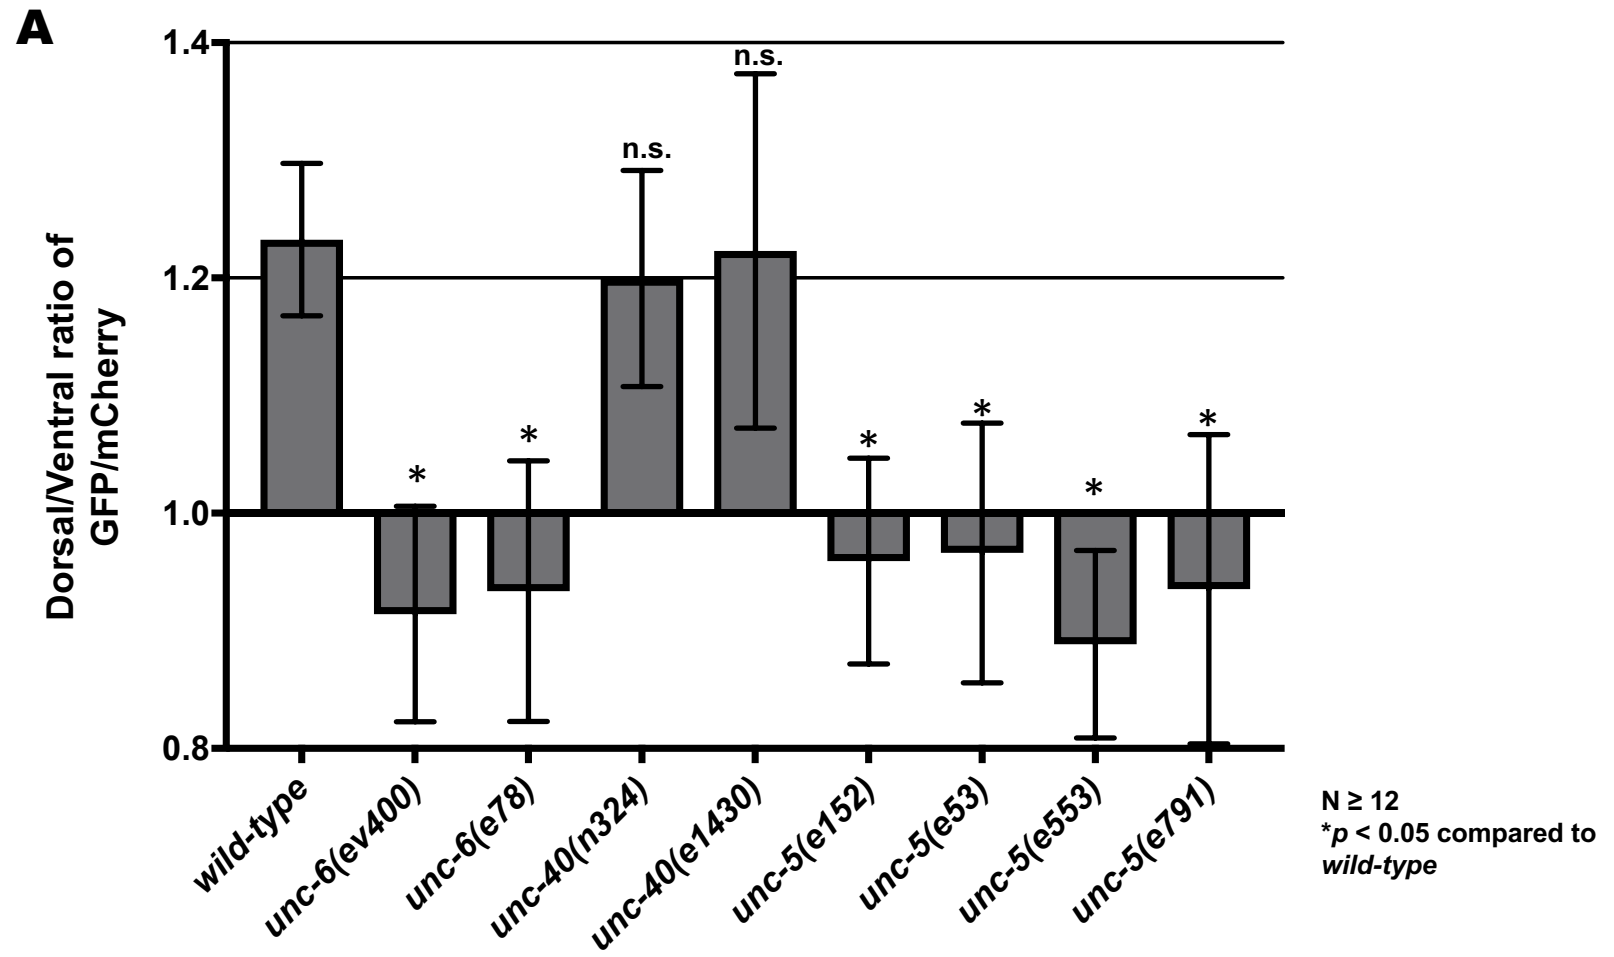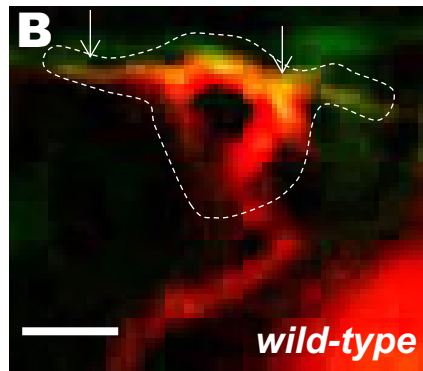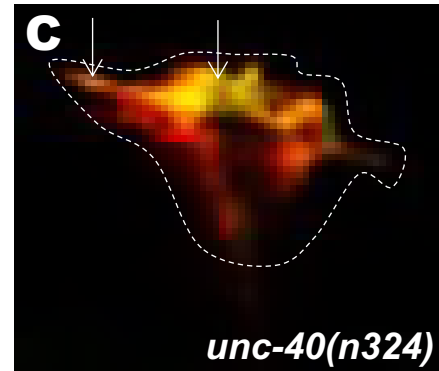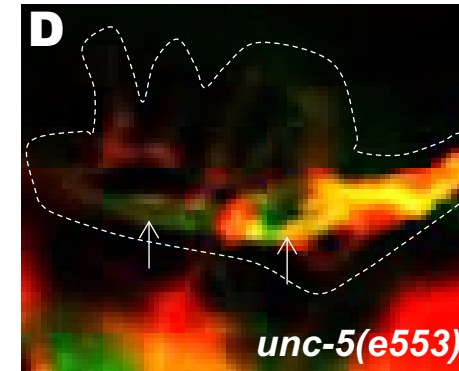

**Fig. 3**

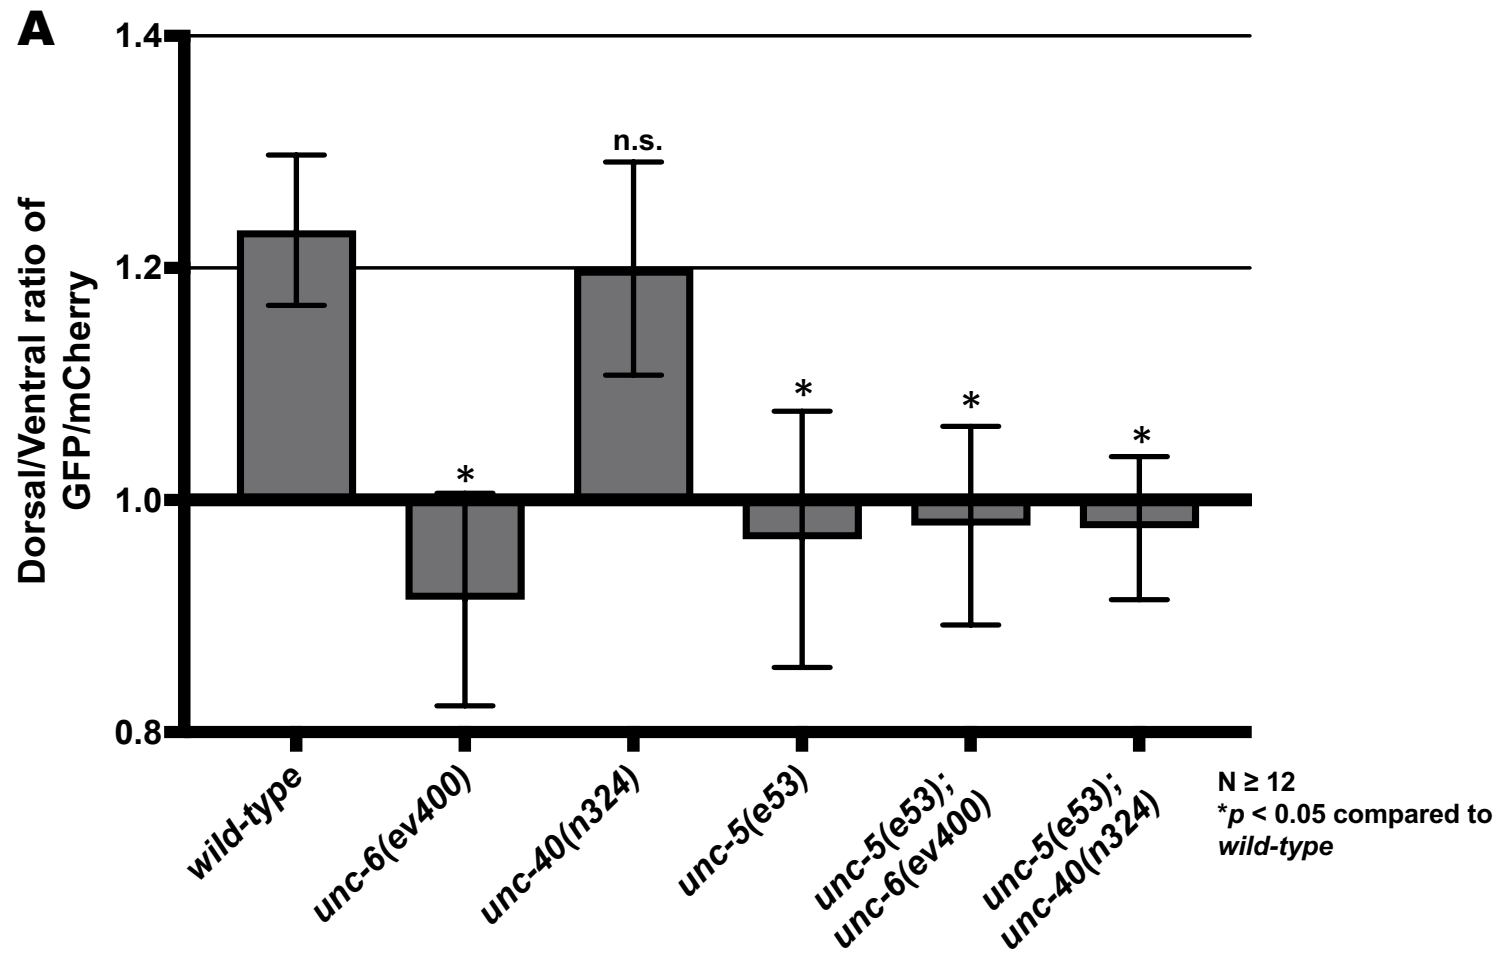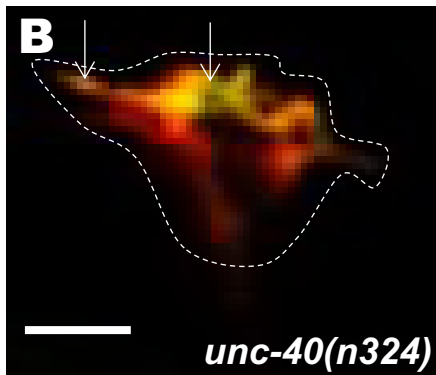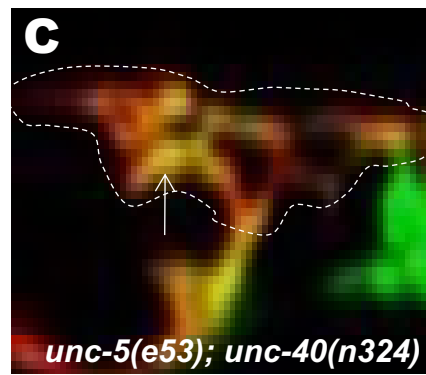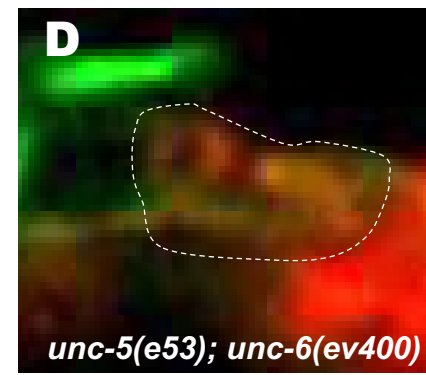

**Fig. 4**

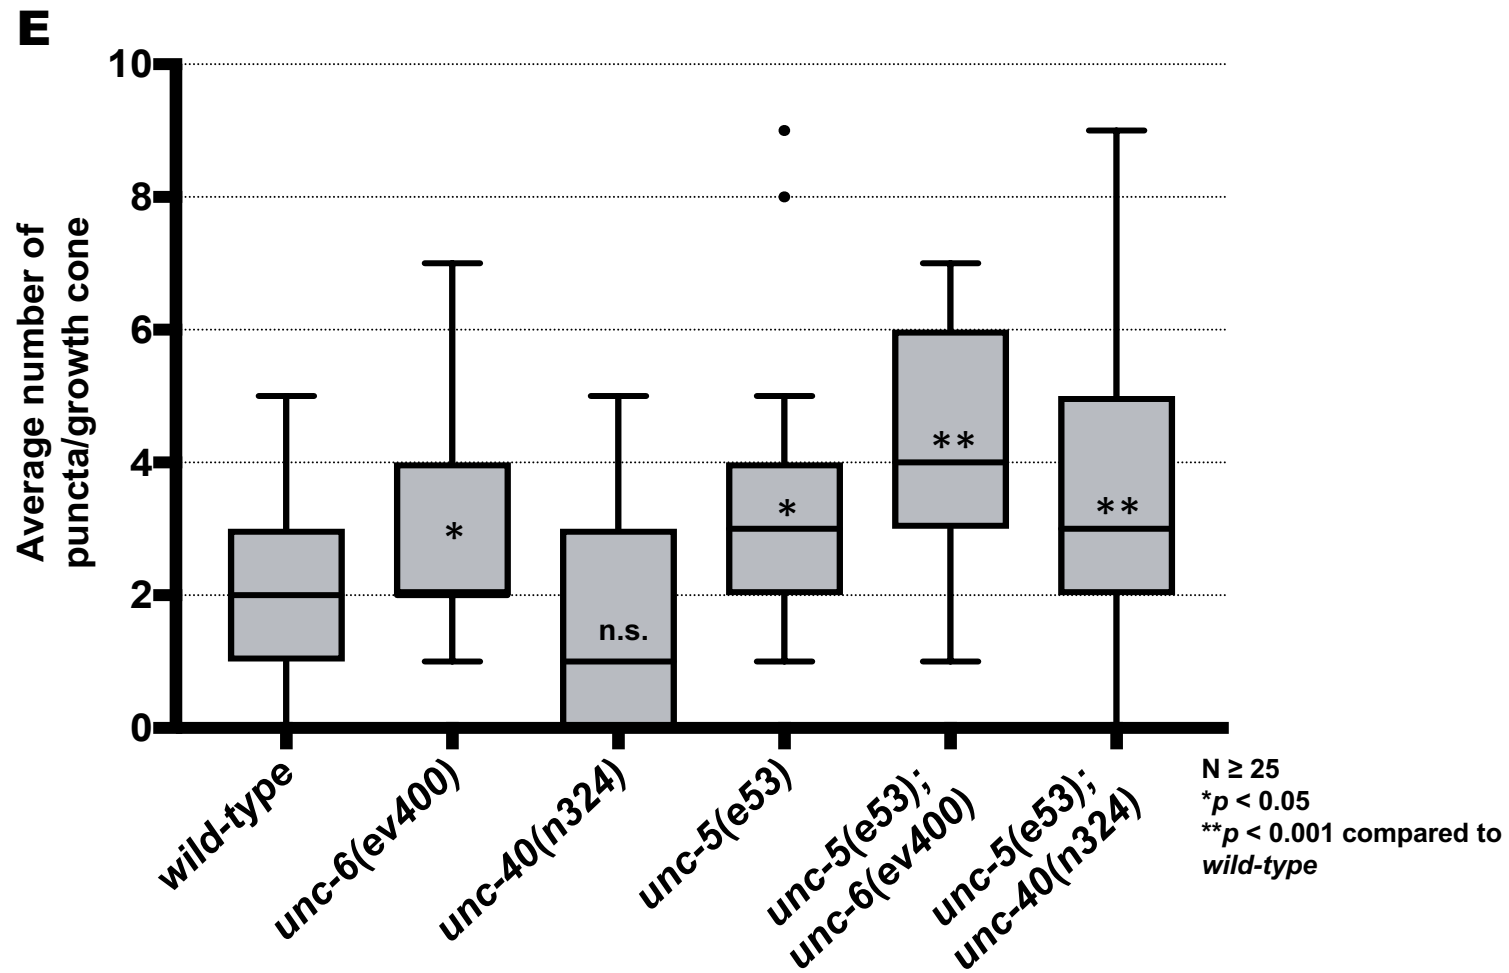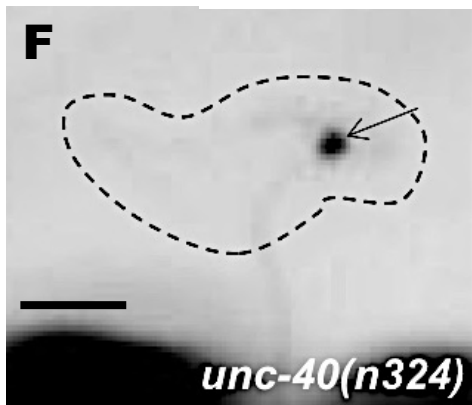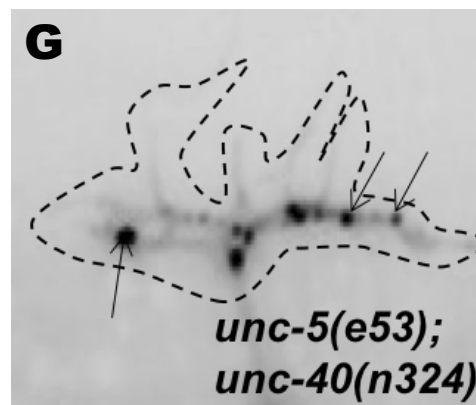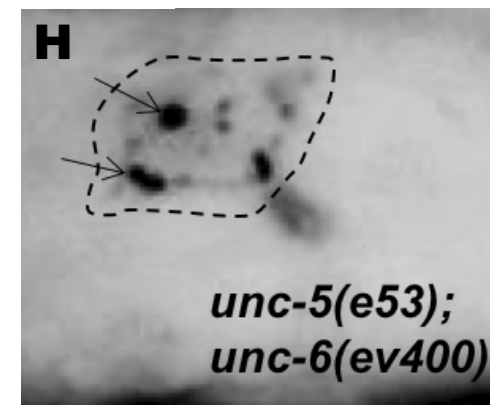

**Fig. 4**

**A**

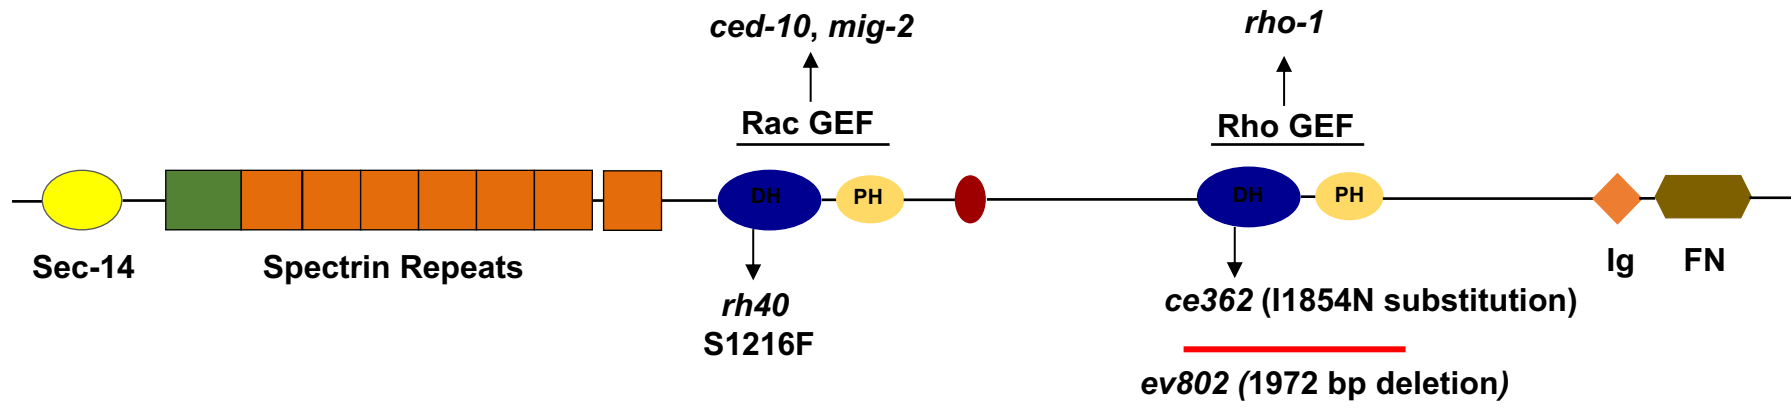

**Fig. 5**

**B**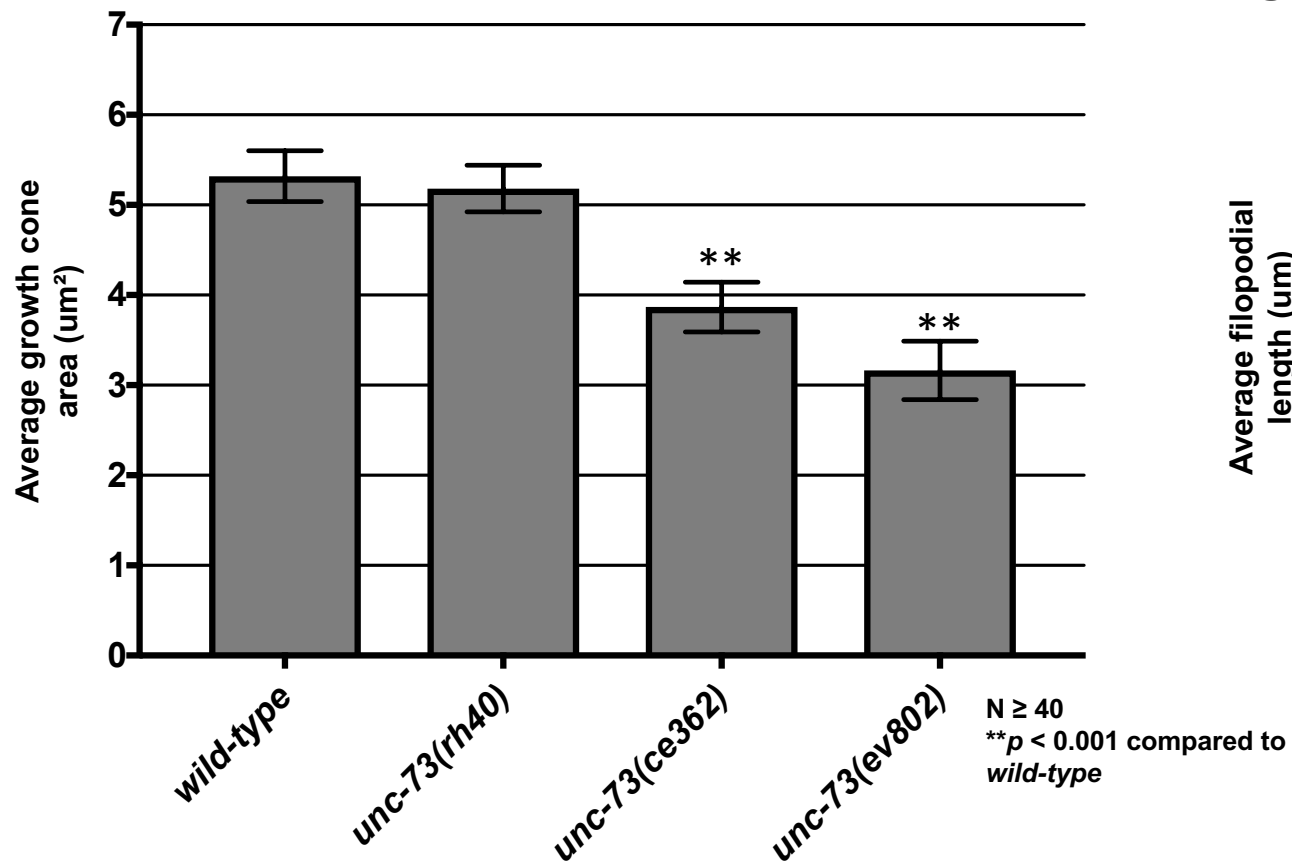**C**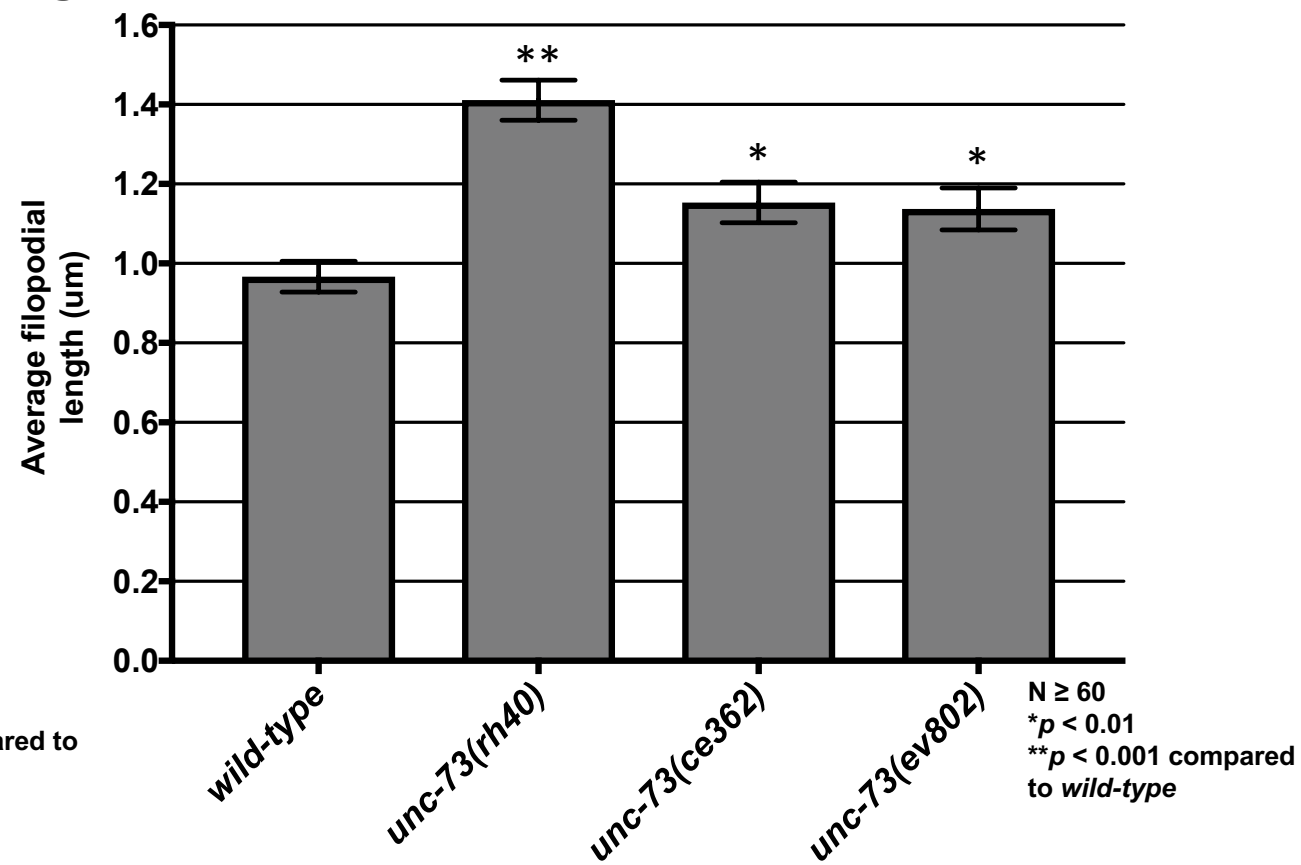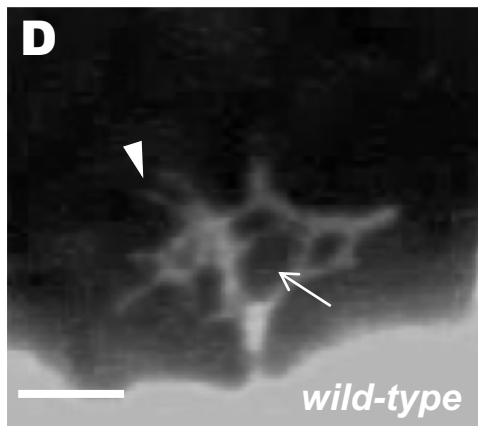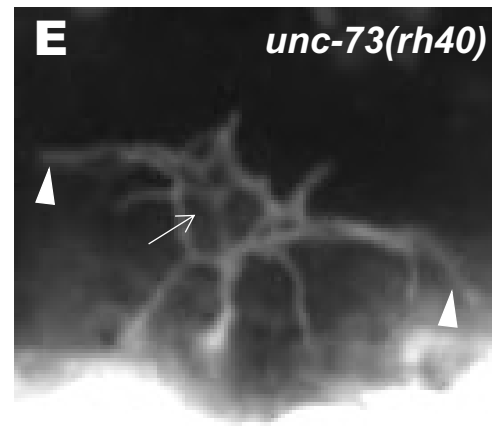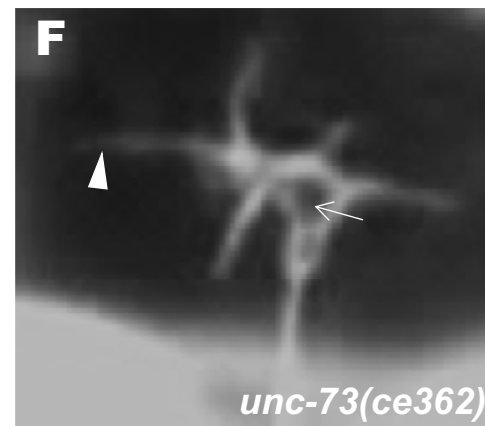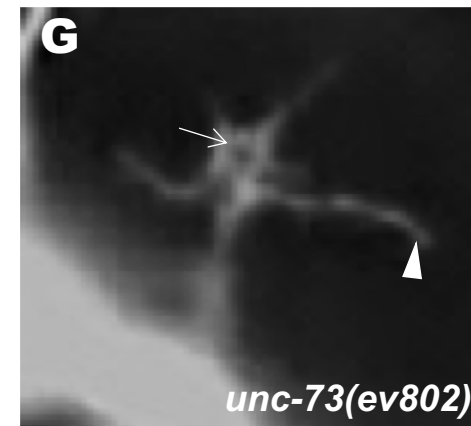**Fig. 5**

**A**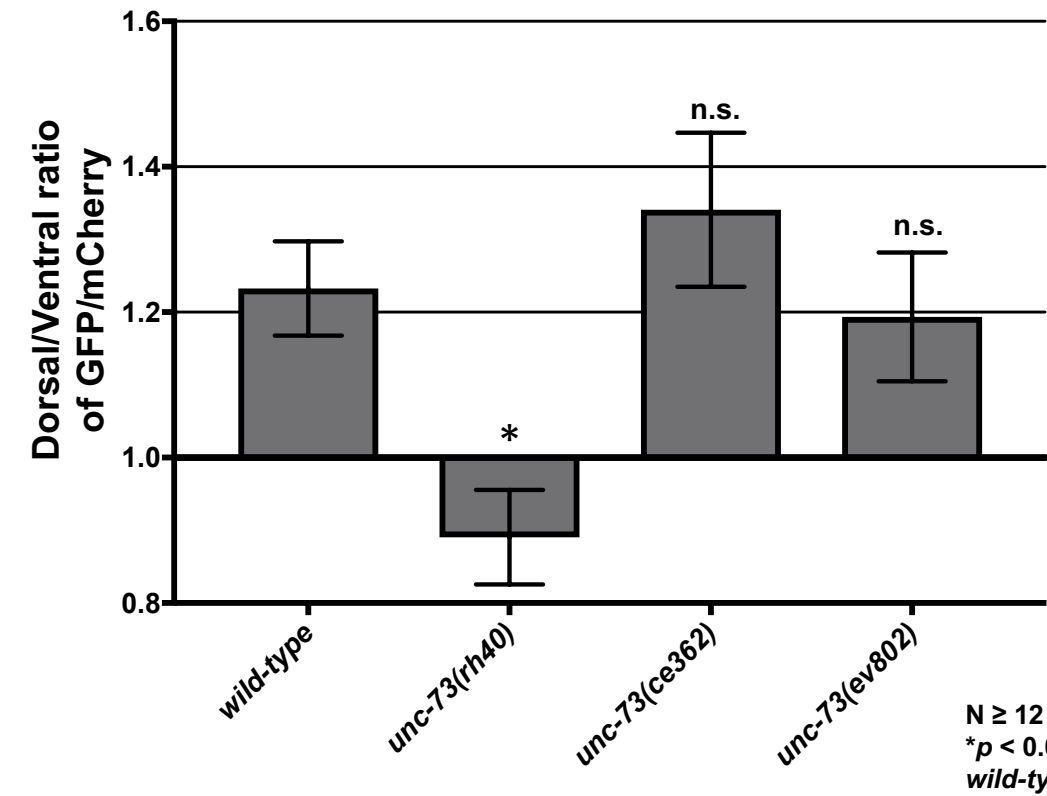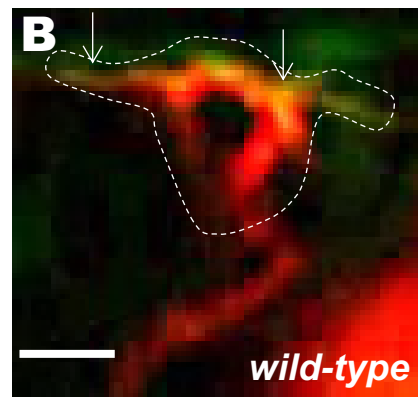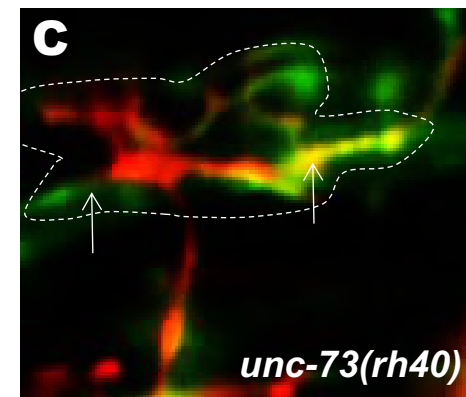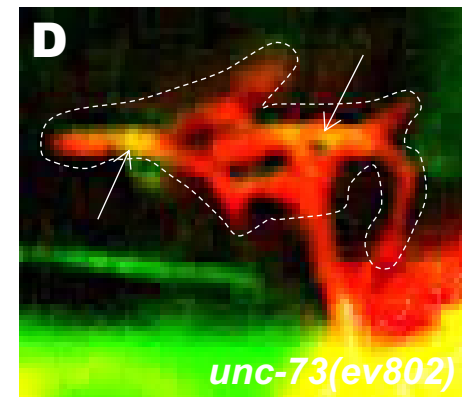**Fig. 6**

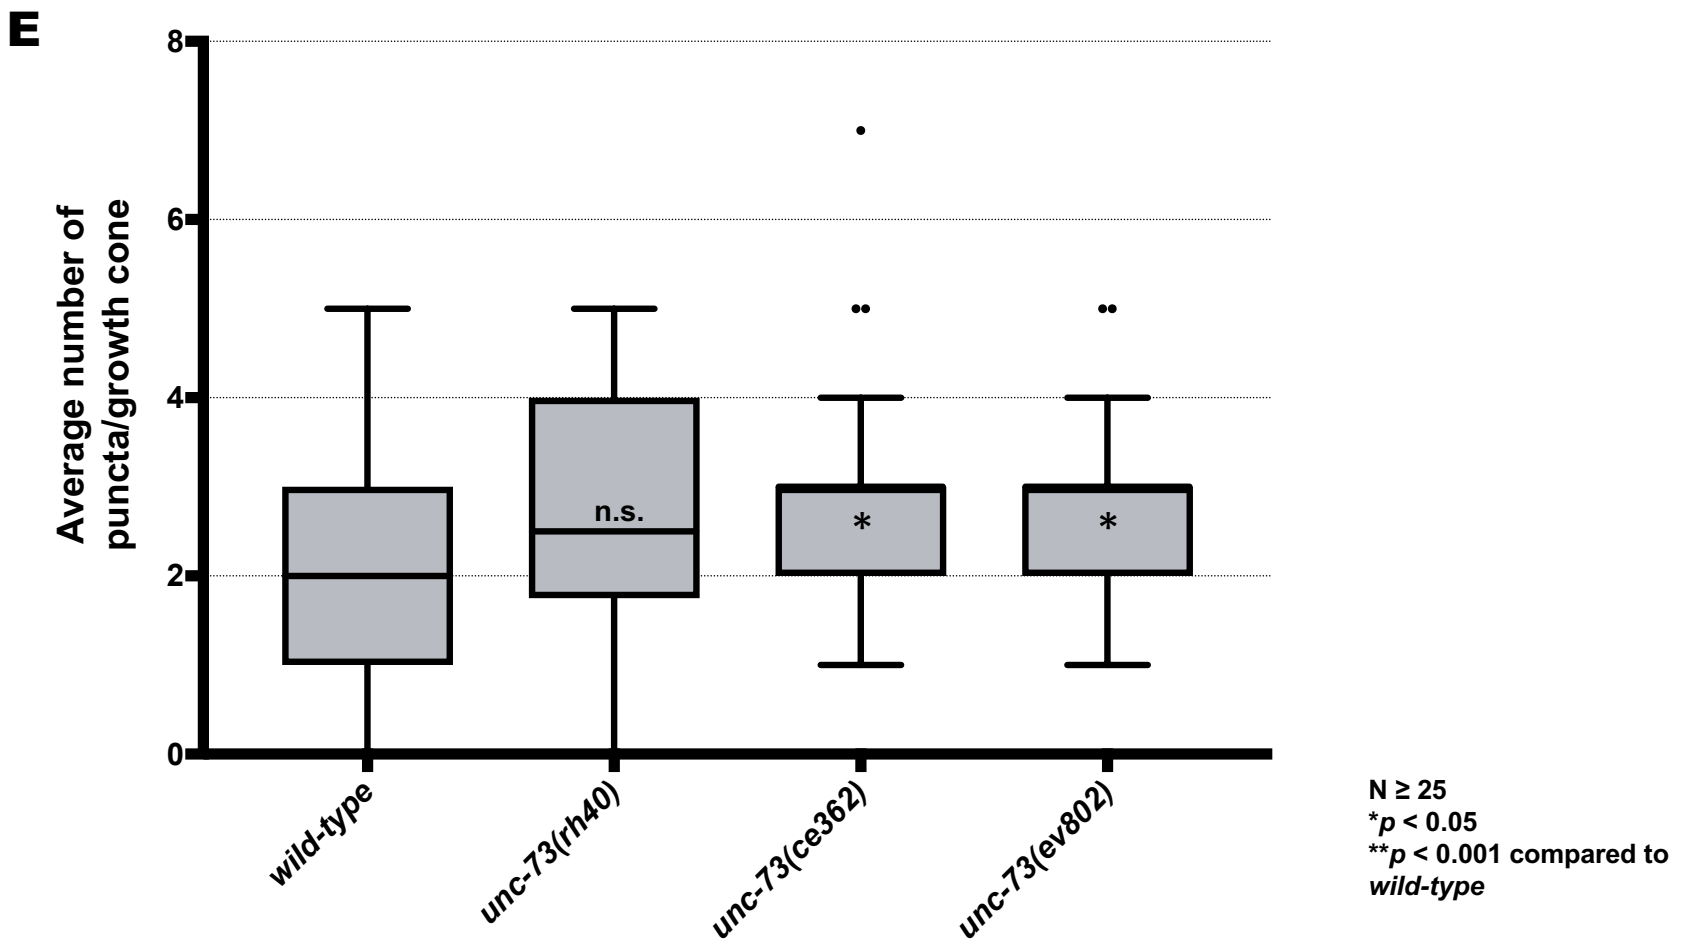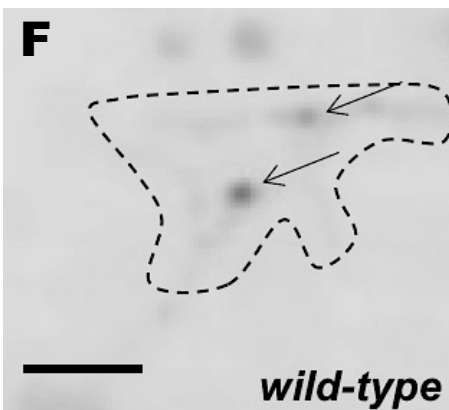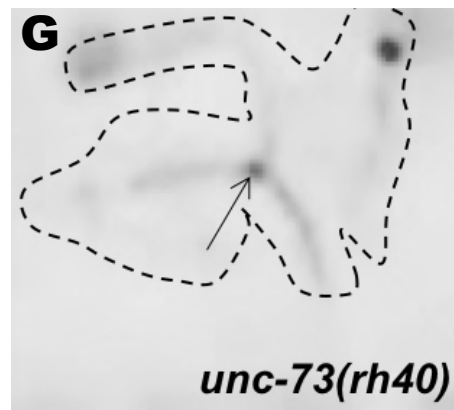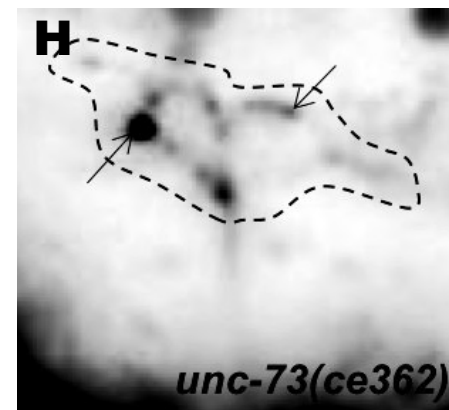

**Fig. 6**



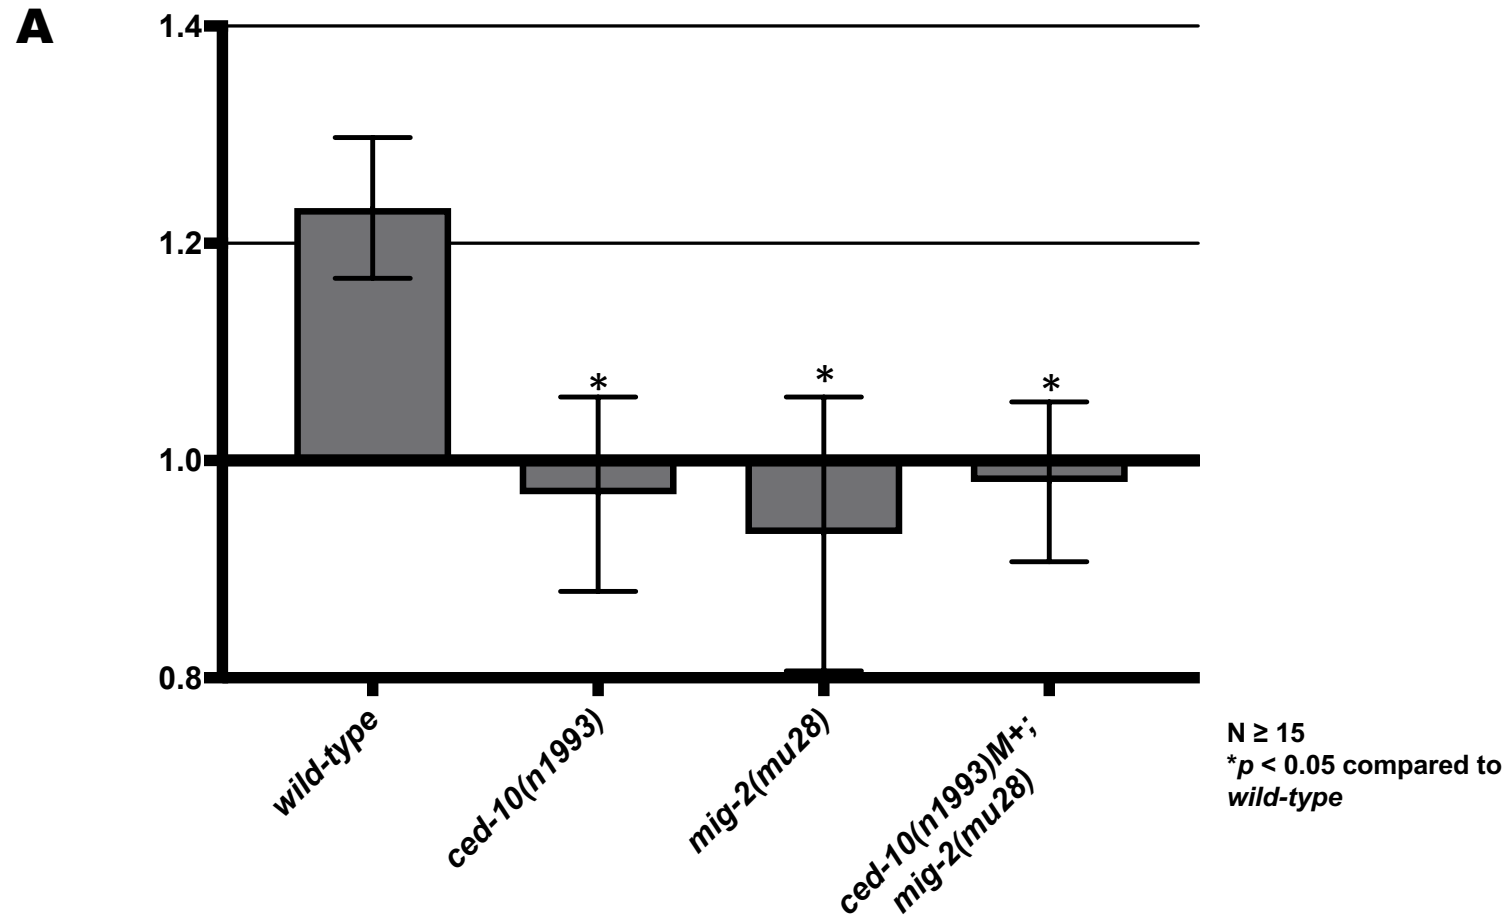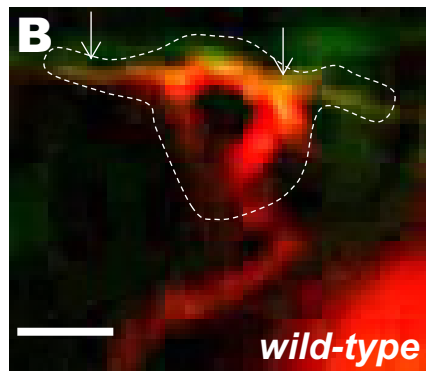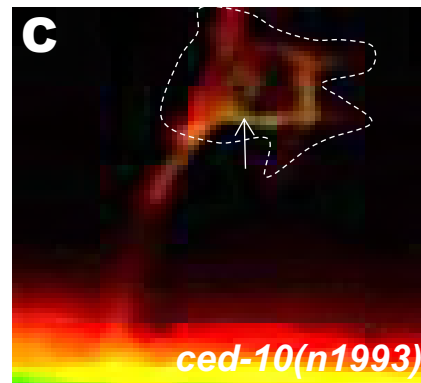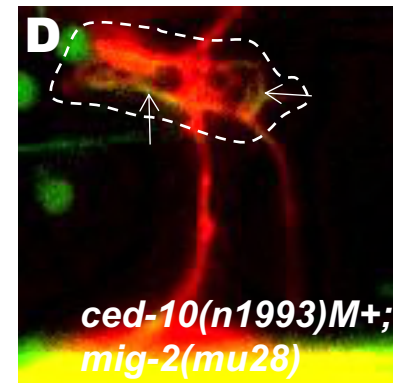

**Fig. 7**

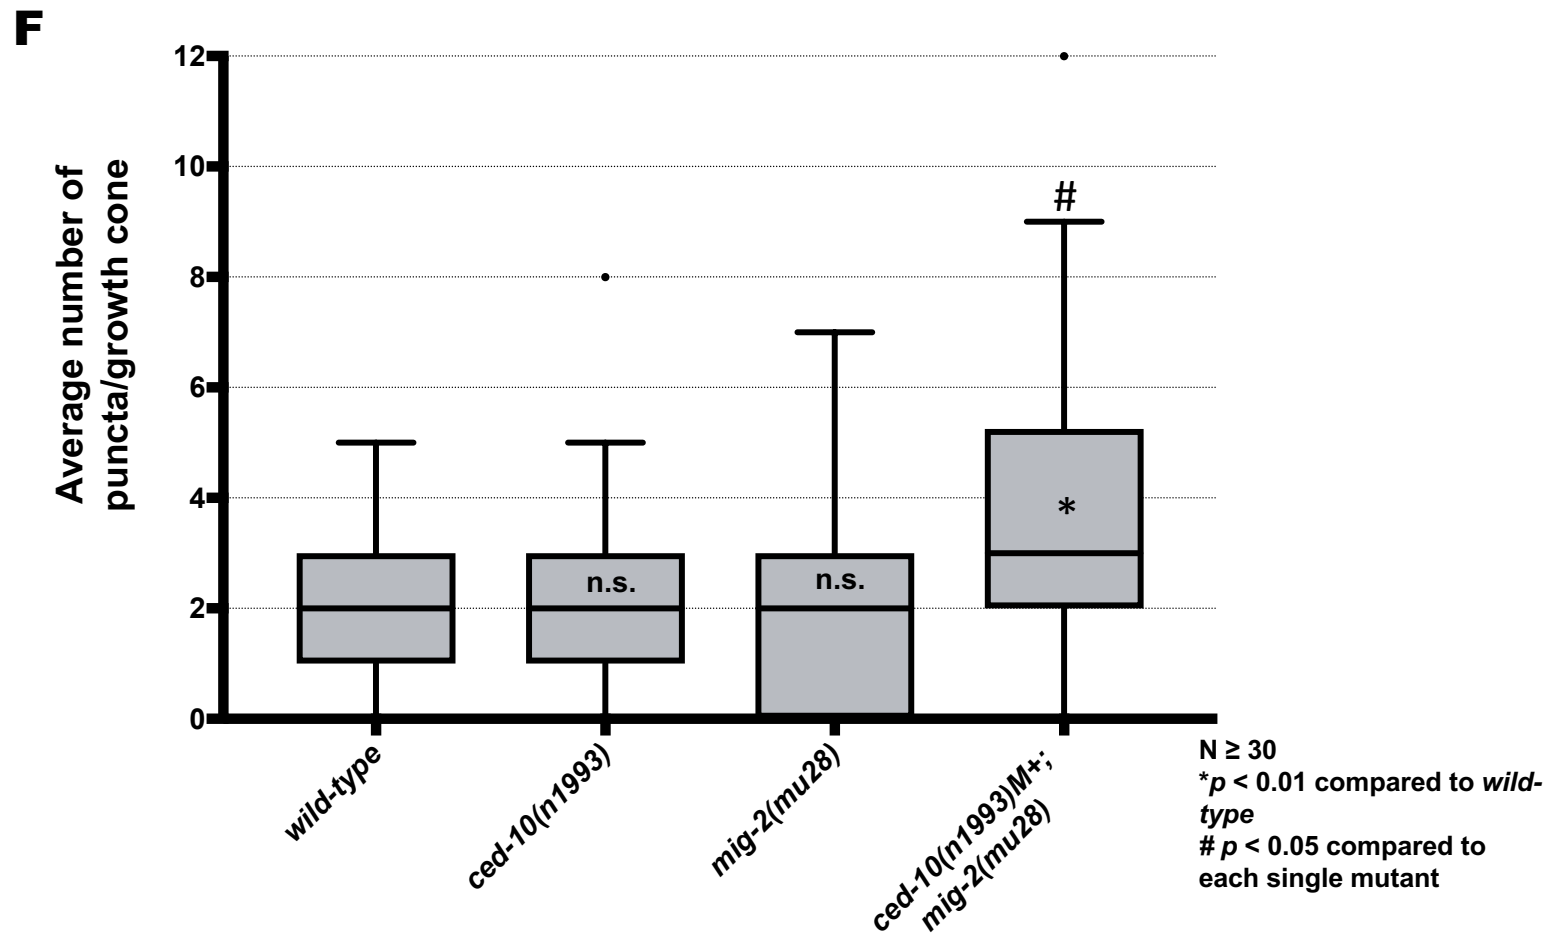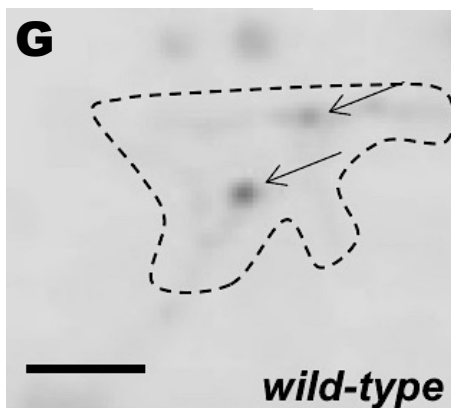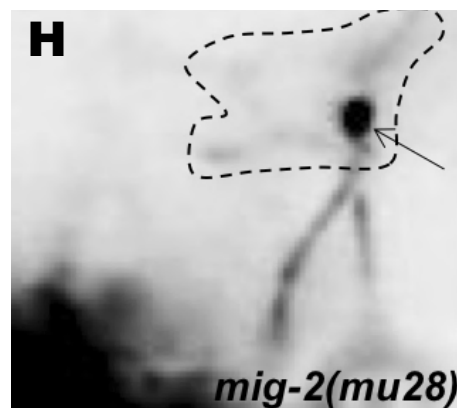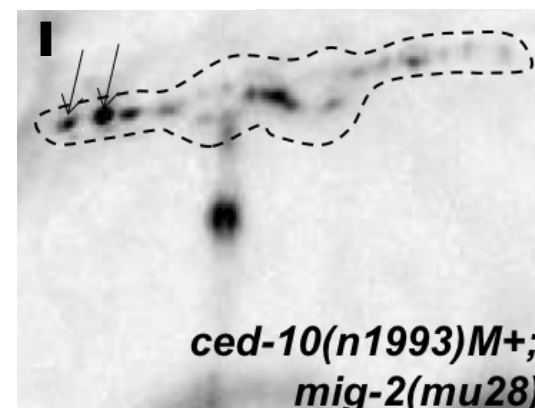

**Fig. 7**

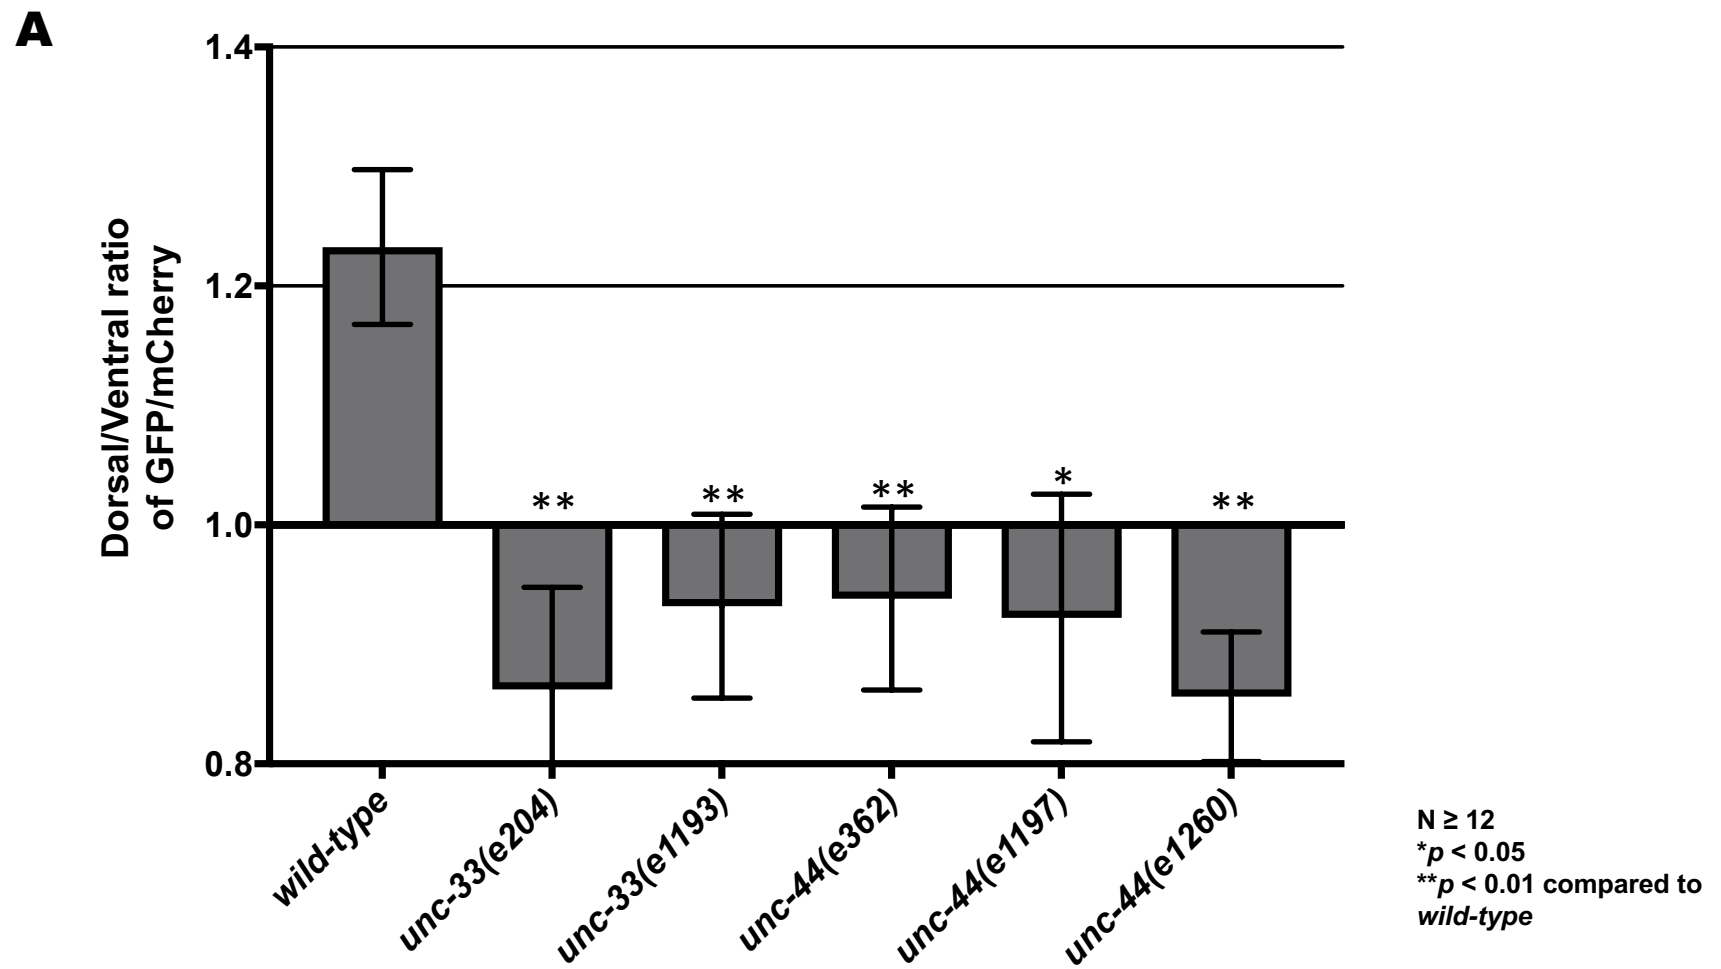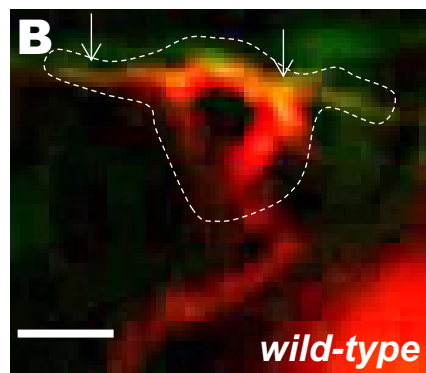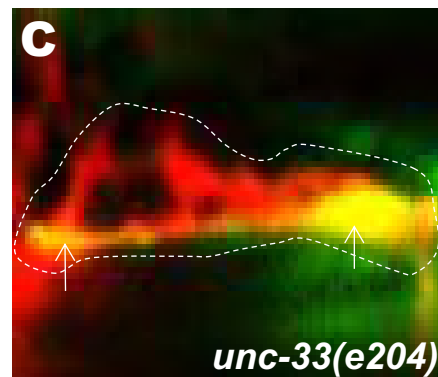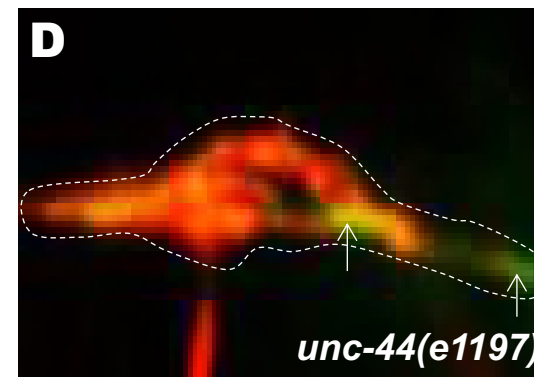

**Fig. 8**

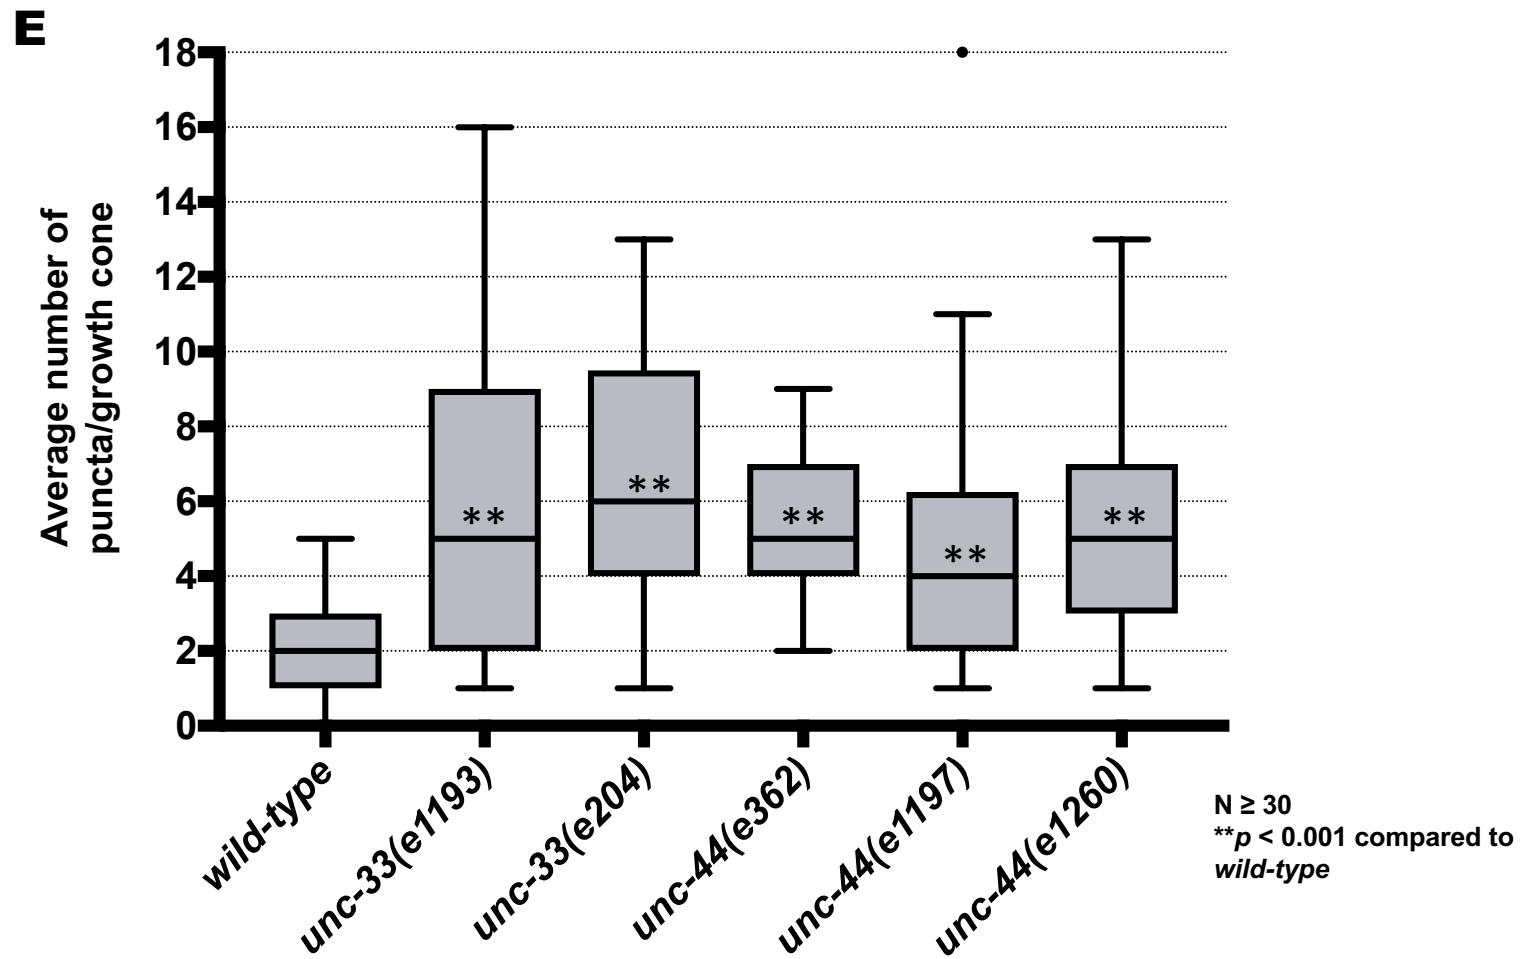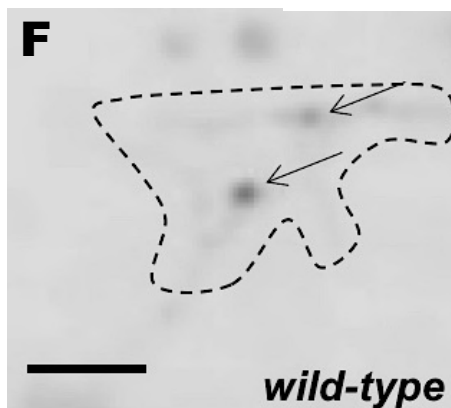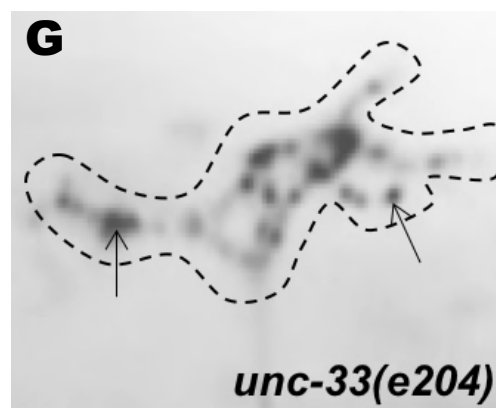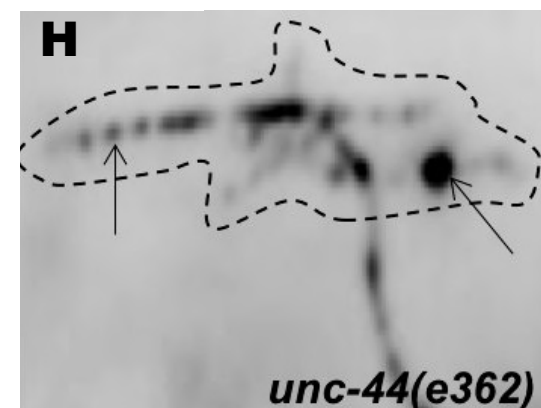

**Fig. 8**

**A**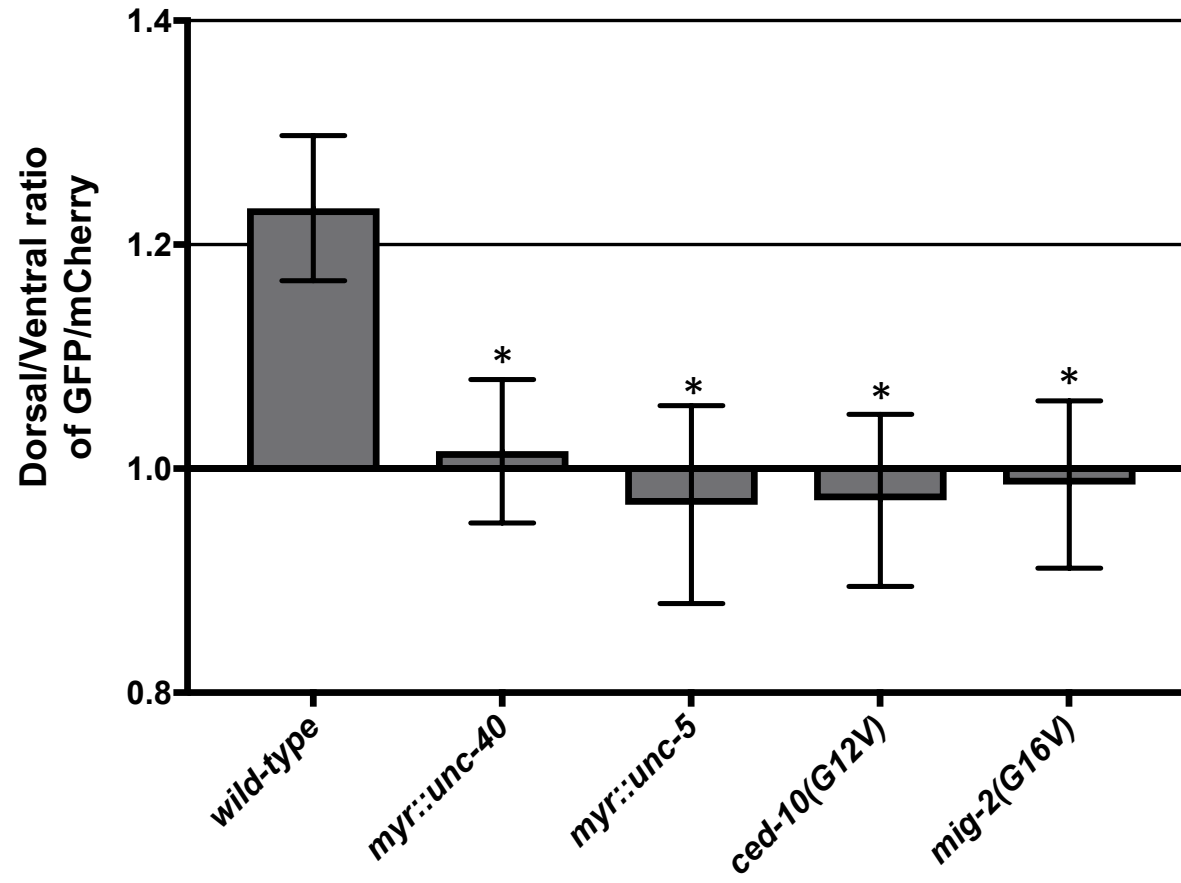

N ≥ 15  
\* $p < 0.05$  compared to  
*wild-type*

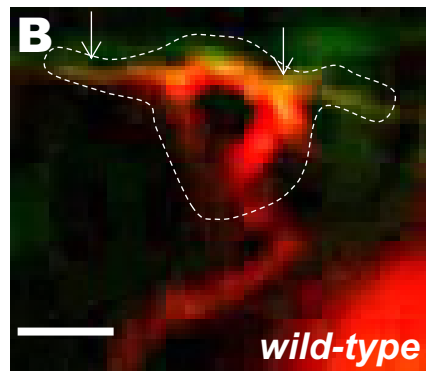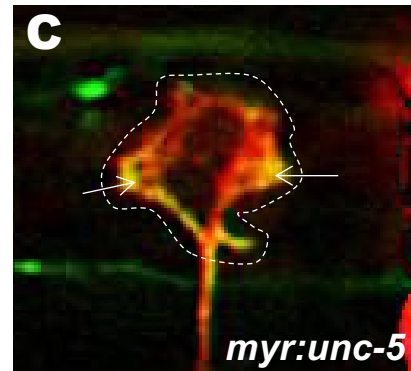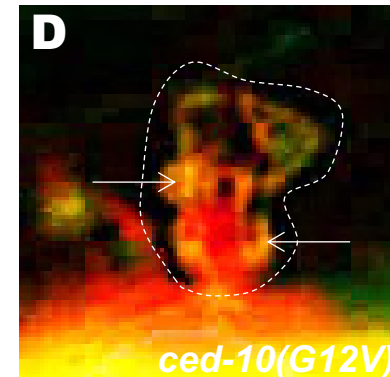**Fig. 9**

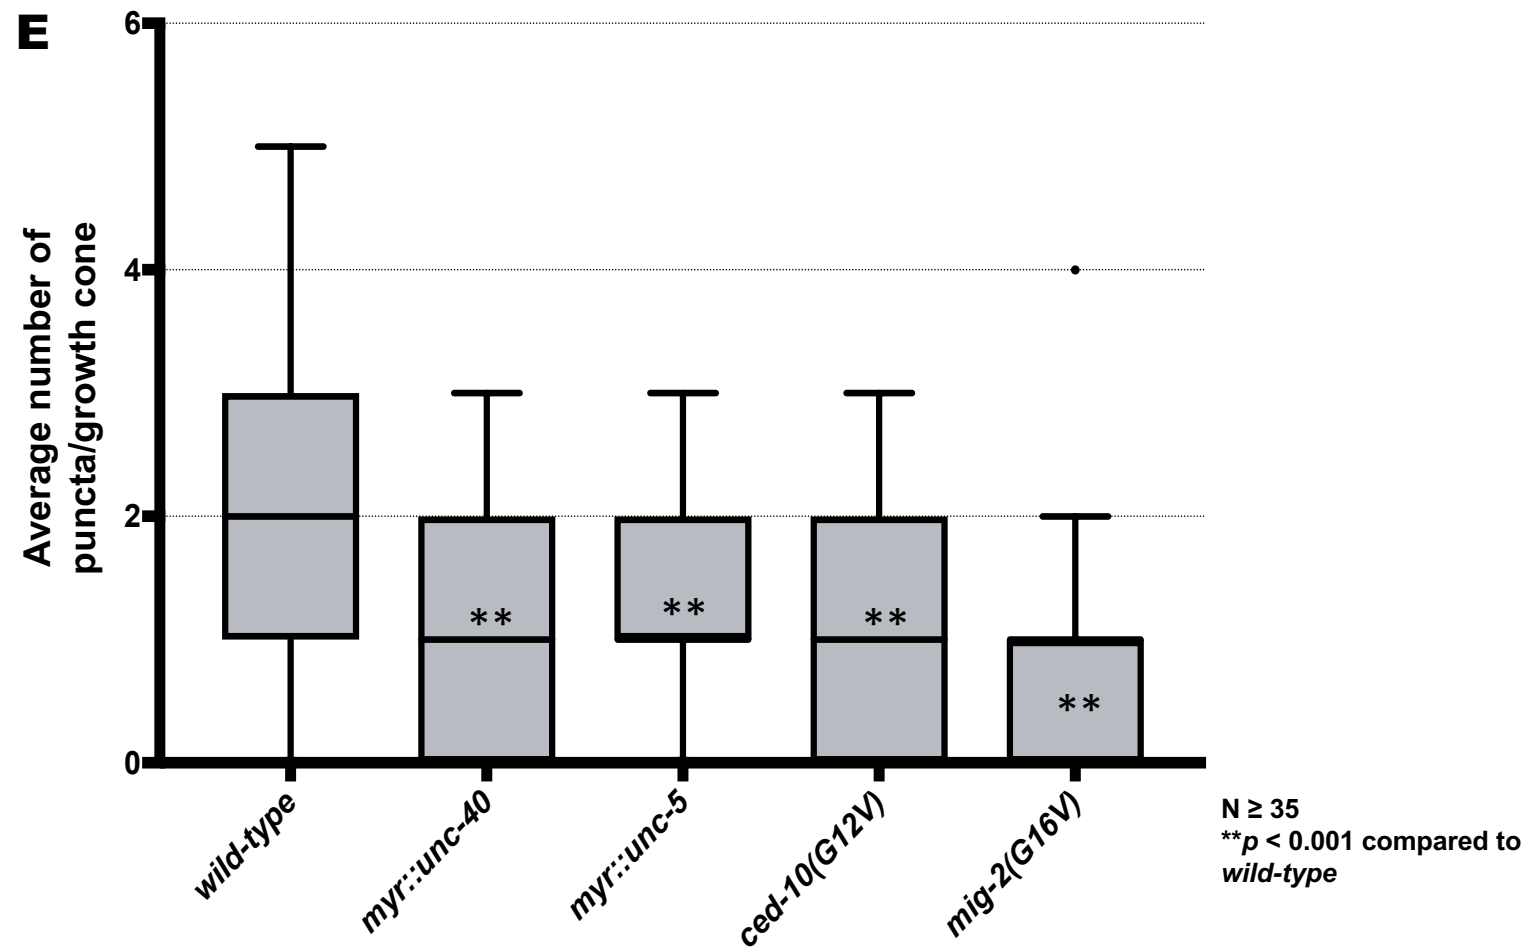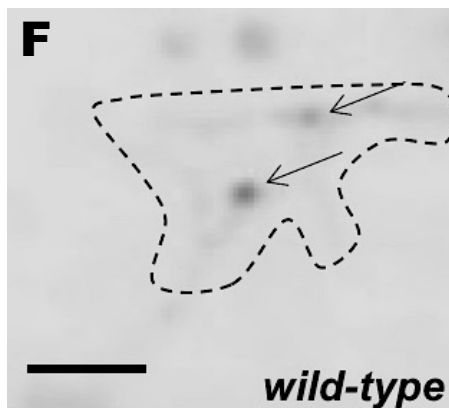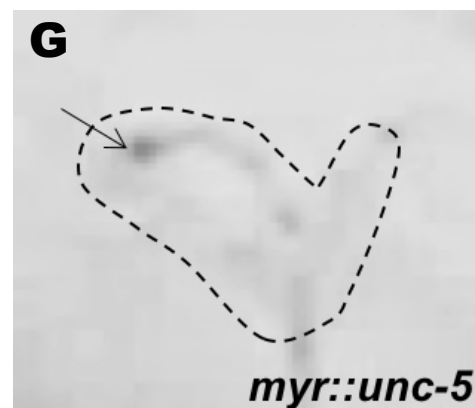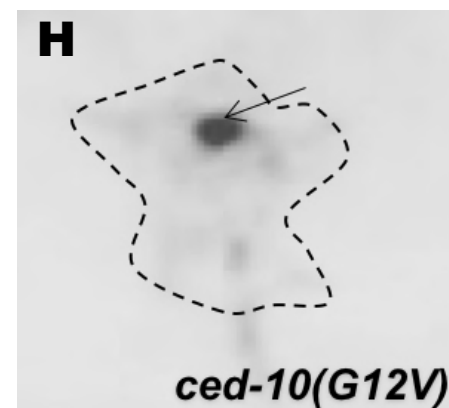

**Fig. 9**

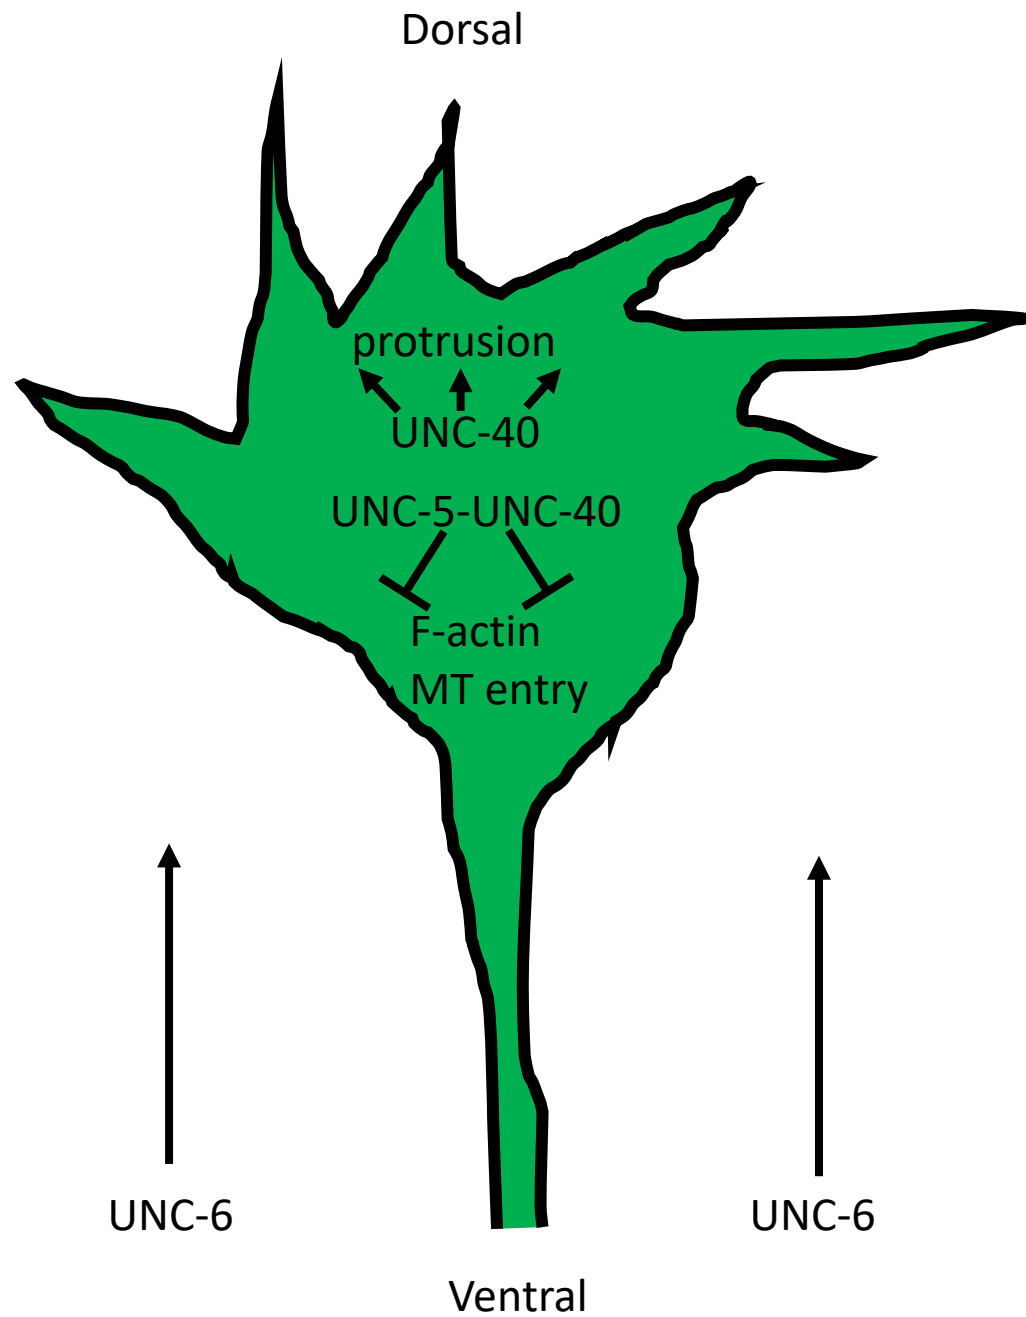

**Fig. 10**
